# Unravelling consensus genomic regions associated with quality traits in wheat (*Triticum aestivum* L.) using meta-analysis of quantitative trait loci

Santosh Gudi<sup>1</sup>, Dinesh Kumar Saini<sup>1</sup>, Gurjeet Singh<sup>1</sup>, Priyanka Halladakeri<sup>2</sup>, Mohammad Shamshad<sup>1</sup>, Mohammad Jafar Tanin<sup>1</sup>, Pradeep Kumar<sup>1</sup> and Achla Sharma<sup>1</sup>

<sup>1</sup>Department of Plant Breeding and Genetics, Punjab Agricultural University, Ludhiana, Punjab, India

<sup>2</sup>Department of Genetics and Plant Breeding, Anand Agricultural University, Gujarat, India

\* Corresponding author

E-mail: [santosh-pbg@pau.edu](mailto:santosh-pbg@pau.edu) (SG)

## Abstract

A meta-analysis of quantitative trait loci (QTLs) associated with following six major quality traits (i) arabinoxylan, (ii) dough rheology properties, (iii) nutritional traits, (iv) polyphenol content, (v) processing quality traits, and (vi) sedimentation volume was conducted in wheat. For this purpose, as many as 2458 QTLs were collected from the 50 mapping studies published during 2013-20. Of the total QTLs, 1126 QTLs were projected on to the consensus map saturated with 2,50,077 markers resulting into the identification of 110 meta-QTLs (MQTLs) with average confidence interval (CI) of 5.6 cM. These MQTLs had 18.84 times reduced CI compared to CI of initial QTLs. Fifty-one (51) MQTLs were also verified with the marker-trait associations (MTAs) detected in earlier genome-wide association studies (GWAS). Physical region occupied by a single MQTL ranged from 0.12 to 749.71 Mb with an average of 130.25 Mb. Candidate gene mining allowed the identification of 2533 unique gene models from the MQTL regions. *In-silico* expression analysis discovered 439 differentially expressed gene models with >2 transcripts per million (TPM) expression in grains and related tissues which also included 44 high-confidence candidate genes known to be involved in the various cellular and biochemical processes related to quality traits. Further, nine functionally characterized wheat genes associated with grain protein content, high molecular weight glutenin and starch synthase enzymes were also found to be co-localized with some of the MQTLs. In addition, synteny analysis between wheat and rice MQTL regions identified 23 wheat MQTLs syntenic to 16 rice MQTLs.

Furthermore, 64 wheat orthologues of 30 known rice genes were detected in 44 MQTL regions. These genes encoded proteins mainly belonging to the following families: starch synthase, glycosyl transferase, aldehyde dehydrogenase, SWEET sugar transporter, alpha amylase, glycoside hydrolase, glycogen debranching enzyme, protein kinase, peptidase, legumain and seed storage protein enzyme.

## Introduction

Wheat (*Triticum aestivum* L.) is a globally grown cereal crop and is a major contributor of calories and protein to the human diet. Currently, wheat is widely consumed and processed into bread, noodles, cakes, pasta, beer, and other products. Wheat research has greatly contributed to its yield enhancement and disease resistance, but focus on quality of the produce took the back stage while enhancing yield. Hence, developing the high yielding varieties with enhanced quality characters is the foremost concern of the breeders [1]. Improving end-use qualities is a tough endeavour because firstly, it is very difficult to measure the seed quality and rheological properties such as grain protein content (GPC), sedimentation rate (SDS), hectolitre weight (HW), 1000-grain weight (TGW), wet gluten content (WGC), dry gluten content (DGC), flour water absorption (FWA), dough development time (DDT), dough stability time (DST), mixing tolerance index (MTI), break down time (BDT) and kernel hardness (KH) as they are labour intensive and also require much seeds for analysis. Secondly, quality characters are complex traits governed by a plethora of gene networks that are largely influenced by several environmental conditions [2].

Quantitative trait locus (QTL) analysis has emerged as an effective approach for dissecting complex traits into component loci and studying the relative effects of the loci on the target trait [3]. Since the first report on QTL analyses for wheat quality traits published in 1990s [4], a plentiful of QTLs have been identified using different mapping populations to underpin the genetic architecture underlying end-use quality, including GPC [5,6], dough rheological properties [5,6], SDS [7], falling number (FN) [8] and starch pasting properties [9]. However, the rationality of these QTL mapping results is strongly influenced by the experimental conditions, type and size of mapping population, density of genetic markers, statistical methods used among others [10]. Thus, the practical implication

of these QTLs for quality improvement via molecular QTL cloning and marker-assisted selection has been rather limited [2]. Considering this challenge, it is desirable to identify QTLs that show major effect on target phenotype and are consistently detected across the multiple genetic backgrounds and environments.

Meta-analysis of available QTLs enable the identification of consensus and robust QTLs or MQTL regions that are most frequently associated with trait variation in diverse studies and reduce their confidence intervals (CIs) [11,12]. Software packages, such as Meta-QTL and BioMercator, facilitate meta-analysis of QTLs derived from independent studies by formulating and embedding specific sets of algorithms for exact evaluation and recalculation of the genetic position for the given QTLs [13]. Among them, BioMercator is the most advanced and commonly used software for projection of initial QTLs on consensus map and identification of MQTLs. In wheat, meta-QTL analysis has already been conducted for different traits, including the ear emergence [14], fusarium head blight [15–17], **tan spot resistance** [18], pre-harvest sprouting tolerance [19], abiotic (drought and heat) stress tolerance [20–22], yield [2,23–25] and baking-quality and GPC [2]. Quraishi et al. (2017) identified the six and eight MQTLs for GPC and baking quality traits, respectively, using the 155 initial QTLs collected from eight interval mapping studies. Since, large number of QTLs have been reported after the meta-QTL analysis for quality traits by Quraishi et al. (2017) in wheat, the present study involving meta-QTL analysis was performed (based on interval mapping studies published during 2013-20) to supplement the list of MQTLs and candidate genes reported in the earlier MQTL study for quality traits [2]. Further, the results of the meta-analysis were integrated with GWAS and transcriptomics studies to identify the promising genomic regions and important CGs, which affect quality traits in wheat. Further, by utilizing the synteny and collinearity of wheat with other cereals [26], ortho-MQTL analysis was conducted to see if the generated information can be transferred to other cereals such as rice. The findings of the present study may help in identification of diagnostic markers and aid marker-assisted breeding to improve quality traits in wheat.

## Results

## Characterization of QTL studies involving quality traits

Characteristics of 50 independent mapping studies involving 63 bi-parental populations were rigorously reviewed to compile information on available QTLs. In total, 2458 QTLs associated with quality traits were collected and they were found to be distributed unequally on all the wheat chromosomes (Fig 1a). Maximum number of QTLs were present on the sub-genome B (995 QTLs), while the minimum number of QTLs were present on the sub-genome D (607 QTLs). There were 45 sets of RIL populations (population size ranging from 83 to 171) and 18 sets of DH populations (population size ranging from 94 to 192) (Fig 1b, c; S1 and S2 Tables). The number of studies involving different DH and RIL populations, molecular markers and mapping methods are presented in Fig 1c, d and respectively. Most of the mapping studies used SSR as the markers and composite interval mapping (CIM) as method for QTL mapping, respectively (Fig 1d, e). Number of QTLs associated with the different quality traits also varied (from 36 QTLs for Ax content to 962 QTLs for DRP). PVE values and LOD score for individual QTLs ranged from 0.01 to 95.24 per cent with a mean of 9.31 per cent and from 0.99 to 55.32 with an average of 5.74, respectively (Fig 1f, g; S1 Table). Peak positions of the initial QTLs also varied (ranging from 0 to 678.2 cM with a mean of 108.18 cM) (Fig 1h).

## Construction of consensus genetic map

The consensus map, “Wheat\_Reference\_GeneticMap-2021” showed significant variation for the genetic lengths of the individual linkage groups/chromosomes (ranging from 361.8 cM for 1A to 808.6 cM for 2A, with a mean of 649.4 cM) and for the number of markers positioned on a single chromosome (ranging from 2,225 on 4D to 21,253 on 3B with an average of 11908.4 markers per chromosome) (Fig 2). The total length of the consensus map measured 13,637.4 cM which included a total of 2,50,077 markers of different types such as AFLP, RFLP, SSR, SNP, etc. Since, different genetic maps with varying number and type of markers were used to construct the consensus map, the distribution of markers on the chromosomes was uneven and density of the markers was comparatively higher at the fore-end of the chromosome (Fig 2; S4 Table). Marker density on

individual chromosomes ranged from 5.7 markers/cM on 4D to 46.2 markers/cM on 1A with a mean of 18.3 markers/cM on whole genome.

## **MQTLs identified for quality traits**

Of the total 1986 QTLs with complete information available for analysis, only 1128 (56.79%) QTLs were projected onto the consensus map. Among the 1128 QTLs, 1121 QTLs were grouped into 110 MQTLs, 7 QTLs remained as singletons (Table 1; Fig 3 and 4). Eight hundred and fifty-eight (850) QTLs were not projected onto the consensus map owing to either of the following reasons: (i) there were no common markers between the consensus and original maps, and (ii) the QTLs had low  $R^2$  values, resulting in a large CI. The number of MQTLs on individual chromosomes ranged from 2 (on chromosomes 5B, 6B and 7A) to 9 (on chromosome 1A) (Fig 3a; S5 Table). The number of clustered QTLs per MQTL ranged from 2 (in several MQTLs) to 85 (in MQTL1B.1) with 11 MQTLs involving at least 20 initial QTLs (Fig 3d; S5 Table). Of these 11 MQTLs, four were located on chromosome 1B and remaining each of the seven MQTLs were located on different chromosomes. Since, these 11 MQTLs integrated the QTLs from different populations, they were considered to be more stable and reliable MQTLs for wheat quality breeding. The chromosome-wise average CI (95%) for the initial QTLs and MQTLs (presented in the Fig 3c) ranged from 14.87 cM (1D) to 95.55 cM (3D) for QTLs and from 0.55 cM (1D) to 34.30 cM (2D) for MQTLs. The average CI of MQTLs (5.56 cM) was 18.84-fold less than that of initial QTLs (40.35 cM), and there were significant differences among different chromosomes (Fig 3c). The average CI of MQTLs reduced maximum for chromosome 5B (72.55 times) and minimum for chromosome 2D (1.99 times) compared to the CI of initial QTLs located on corresponding chromosomes.

Individual QTLs for processing quality traits were found to be associated with as many as 98 MQTLs and for that of the other traits are given in Fig 3b and S5 Table. All MQTLs were associated with at least one quality trait (Fig 3e). As many as 38 MQTLs were exclusively associated with only a single quality trait, whereas, four MQTLs (viz., 2D.2, 5A.2, 5D.4, and 7B.3) were found to be associated with 5 quality related traits (S5 Table). None of the MQTL included the QTLs associated

with all of the six studied traits. MQTLs associated with multiple traits are considered to be more important for the breeding programmes aiming towards the simultaneous improvement of multiple quality traits. In this regard, MQTLs (viz., 2D.2, 5A.2, 5D.4, and 7B.3) were considered as more promising and breeders can use them to enhance multiple quality traits simultaneously.

**Table 1.** Summary of wheat MQTLs associated with different quality traits

| S. No. | MQT Ls    | Genetic position (cM) |       | Flanking genetic markers |                  | Physical position (bp) |       | Number of QTLs projected |
|--------|-----------|-----------------------|-------|--------------------------|------------------|------------------------|-------|--------------------------|
|        |           | Start                 | End   | Start                    | End              | Start                  | End   |                          |
| 1      | MQTL 1A.1 | 14.7                  | 15.1  | IWB72800                 | D-1377838        | 9.5                    | 36.6  | 24                       |
| 2      | MQTL 1A.2 | 22.3                  | 22.7  | 3980487_1al_1115_1       | IWB35066         | 39.6                   | 41.7  | 20                       |
| 3      | MQTL 1A.3 | 36.1                  | 36.4  | BobWhite_c5793_372       | 3955448_1al_1513 | 3.5                    | 22.7  | 10                       |
| 4      | MQTL 1A.4 | 42.6                  | 43.1  | 3881592_1al_184          | wPt2311          | 22.7                   | 23.7  | 14                       |
| 5      | MQTL 1A.5 | 68.6                  | 69.1  | AX-109031595             | wPt8172          | 300.4                  | 489.5 | 6                        |
| 6      | MQTL 1A.6 | 85.5                  | 87.8  | Tdurum_contig471_83_205  | Xwpt3698         | 30.5                   | 42.3  | 2                        |
| 7      | MQTL 1A.7 | 92.9                  | 94.8  | Xbarc174                 | wPt1906          | 41.9                   | 42.3  | 15                       |
| 8      | MQTL 1A.8 | 118.4                 | 123.1 | snp2584                  | wPt7030          | 550.3                  | 551.3 | 10                       |
| 9      | MQTL 1A.9 | 156.6                 | 156.9 | D_3022884                | Xcfe0242b        | 516.4                  | 530.3 | 12                       |
| 10     | MQTL 1B.1 | 41.2                  | 41.4  | AX-95133874              | Xwmc44           | 635.0                  | 635.1 | 85                       |
| 11     | MQTL 1B.2 | 66.3                  | 66.8  | IWB65744                 | AX-94462160      | 442.2                  | 646.1 | 21                       |
| 12     | MQTL 1B.3 | 77.0                  | 77.6  | IWB13393                 | IWA7298          | 542.4                  | 543.0 | 27                       |
| 13     | MQTL 1B.4 | 110.0                 | 111.7 | Ku_c241_460              | IWB6906          | 328.0                  | 548.6 | 12                       |
| 14     | MQTL 1B.5 | 195.5                 | 197.3 | wPt1973                  | wPt_2315         | 7.2                    | 8.2   | 21                       |
| 15     | MQTL 1B.6 | 428.3                 | 439.3 | Kukri_rep_c11199_1_498   | XPaggMcgg6       | 408.6                  | 553.0 | 9                        |
| 16     | MQTL 1D.1 | 43.6                  | 43.9  | Xbarc229.2               | cf92             | 28.7                   | 31.0  | 21                       |
| 17     | MQTL 1D.2 | 47.2                  | 47.6  | 2257978_1dl_1591_3       | 2281626_1dl_570  | 420.7                  | 449.0 | 11                       |
| 18     | MQTL 1D.3 | 60.1                  | 60.7  | D_1073588                | D_1234123        | 433.5                  | 435.8 | 14                       |
| 19     | MQTL 1D.4 | 76.0                  | 76.0  | TA004476-0719            | Glu_D1           | 411.6                  | 411.7 | 2                        |
| 20     | MQTL 1D.5 | 77.0                  | 77.0  | TA004476-0719            | Glu_D1           | 411.6                  | 411.7 | 16                       |
| 21     | MQTL 1D.6 | 109.4                 | 110.6 | AX-95218664              | AX-94769043      | 494.6                  | 573.1 | 10                       |
| 22     | MQTL 1D.7 | 156.9                 | 158.3 | IWB9092                  | IWB56444         | 459.0                  | 460.1 | 12                       |

|    |              |       |       |                       |                       |       |       |    |
|----|--------------|-------|-------|-----------------------|-----------------------|-------|-------|----|
| 23 | MQTL<br>2A.1 | 8.1   | 11.9  | Xgwm328_2A            | GBS_210               | 8.8   | 16.8  | 11 |
| 24 | MQTL<br>2A.2 | 28.4  | 28.6  | Kukri_c36139_292      | BS00063632_51         | 14.8  | 19.4  | 15 |
| 25 | MQTL<br>2A.3 | 81.2  | 82.3  | RAC875_c17787_274     | TA004602-1630         | 7.6   | 14.8  | 14 |
| 26 | MQTL<br>2A.4 | 99.5  | 100.3 | wPt-8049              | IWB23030              | 57.8  | 61.3  | 9  |
| 27 | MQTL<br>2A.5 | 248.2 | 260.8 | BS00082084_51         | RAC875_c54668_102     | 732.6 | 770.9 | 2  |
| 28 | MQTL<br>2A.6 | 292.9 | 292.9 | RAC875_c54668_102     | wsnp_Ku_c1292_2572110 | 27.9  | 45.1  | 10 |
| 29 | MQTL<br>2B.1 | 0.7   | 0.9   | M35745                | D_1162944             | 32.5  | 34.4  | 12 |
| 30 | MQTL<br>2B.2 | 25.3  | 29.2  | Xwmc435               | IWA897                | 58.8  | 217.3 | 6  |
| 31 | MQTL<br>2B.3 | 49.9  | 50.3  | Ex_c55735_1012        | Xwpt8004              | 556.2 | 681.5 | 11 |
| 32 | MQTL<br>2B.4 | 73.2  | 75.0  | Xgwm55b               | Excalibur_c33221_681  | 532.1 | 736.4 | 6  |
| 33 | MQTL<br>2B.5 | 93.9  | 95.2  | CAP7_6910_523         | 8086989_2bl_2189      | 31.0  | 32.5  | 9  |
| 34 | MQTL<br>2B.6 | 136.7 | 139.7 | 8074934_2bl_7628      | Kukri_c9507_495       | 236.3 | 784.9 | 12 |
| 35 | MQTL<br>2B.7 | 228.7 | 230.0 | Xgwm1273              | U296                  | 41.2  | 790.9 | 8  |
| 36 | MQTL<br>2D.1 | 28.8  | 32.1  | 2DS_5366150_1491      | AX-95093513           | 48.3  | 579.9 | 6  |
| 37 | MQTL<br>2D.2 | 63.7  | 65.8  | AX-110230565          | Xctg05205             | 429.2 | 584.5 | 14 |
| 38 | MQTL<br>2D.3 | 112.5 | 113.6 | Kukri_c44769_750      | BS00011109_51         | 409.6 | 608.8 | 5  |
| 39 | MQTL<br>2D.4 | 140.0 | 140.1 | IWB64805              | IWB34403              | 428.9 | 542.3 | 2  |
| 40 | MQTL<br>2D.5 | 163.8 | 169.7 | IWB29964              | IWB32041              | 574.4 | 593.5 | 2  |
| 41 | MQTL<br>2D.6 | 337.3 | 530.5 | IWB44461              | GENE_4086_115         | 604.1 | 629.2 | 3  |
| 42 | MQTL<br>3A.1 | 0.0   | 3.5   | Excalibur_c12875_1573 | 4397491_3al_1806      | 513.6 | 571.4 | 3  |
| 43 | MQTL<br>3A.2 | 25.5  | 25.6  | AX-109316906          | P41/M41-4             | 614.0 | 733.5 | 19 |
| 44 | MQTL<br>3A.3 | 65.7  | 70.5  | IWB54878.1            | KUKRI_REP_C69970_717  | 650.4 | 724.6 | 4  |
| 45 | MQTL<br>3A.4 | 110.5 | 111.0 | XPaggMcgg1            | Excalibur_c5416_846   | 569.4 | 737.3 | 9  |
| 46 | MQTL<br>3B.1 | 34.0  | 36.7  | XPaggMctg16           | wPt7502               | 616.9 | 760.6 | 10 |
| 47 | MQTL<br>3B.2 | 72.4  | 73.7  | IWB6207               | D-4329487             | 31.7  | 32.3  | 6  |
| 48 | MQTL<br>3B.3 | 111.5 | 113.6 | AX-109869742          | AX-109842601          | 773.8 | 787.0 | 11 |
| 49 | MQTL<br>3B.4 | 173.9 | 174.4 | ACA.CTGA12            | Xctgacg317            | 553.1 | 798.3 | 21 |
| 50 | MQTL<br>3D.1 | 36.2  | 39.2  | AX-95218150           | AX-110037813          | 597.5 | 597.9 | 6  |
| 51 | MQTL<br>3D.2 | 67.2  | 69.2  | IWB40541              | IWB19457              | 600.1 | 600.3 | 8  |
| 52 | MQTL         | 122.3 | 144.9 | wPt669255             | RFL_Contig5276_17     | 21.8  | 73.9  | 4  |



|    | 3D.3         |       |       |                         | 56                          |       |       |    |
|----|--------------|-------|-------|-------------------------|-----------------------------|-------|-------|----|
| 53 | MQTL<br>3D.4 | 189.1 | 238.9 | RFL_Contig5276_<br>1756 | BS00066932_51               | 73.9  | 515.7 | 3  |
| 54 | MQTL<br>4A.1 | 8.9   | 10.8  | Kukri_c17417_797        | Xgwm113                     | 24.1  | 601.3 | 11 |
| 55 | MQTL<br>4A.2 | 34.7  | 38.8  | wPt7924                 | wPt0538                     | 671.9 | 713.0 | 6  |
| 56 | MQTL<br>4A.3 | 66.7  | 71.5  | wPt0105                 | snp1066                     | 623.3 | 699.5 | 3  |
| 57 | MQTL<br>4A.4 | 113.2 | 115.3 | IAAV5818                | SSRabg390.DI                | 603.5 | 730.5 | 30 |
| 58 | MQTL<br>4A.5 | 164.7 | 165.0 | RAC875_c78248_<br>115   | BS00067074_51               | 602.3 | 609.4 | 19 |
| 59 | MQTL<br>4B.1 | 12.3  | 12.5  | Xfb255a                 | D_3939025                   | 13.9  | 15.0  | 15 |
| 60 | MQTL<br>4B.2 | 20.9  | 21.4  | Xmag983                 | S-3025233                   | 601.9 | 609.5 | 6  |
| 61 | MQTL<br>4B.3 | 44.9  | 45.2  | AX-110396575            | BS00076259_51               | 457.9 | 616.6 | 11 |
| 62 | MQTL<br>4B.4 | 52.3  | 52.8  | wPt_3908                | Xgwm538                     | 32.8  | 53.6  | 16 |
| 63 | MQTL<br>4B.5 | 89.3  | 92.3  | IWB73486                | IWB15523                    | 660.7 | 663.1 | 11 |
| 64 | MQTL<br>4B.6 | 181.8 | 185.4 | Xgwm637b                | wsnp_CAP12_c1101<br>_569783 | 237.0 | 609.5 | 10 |
| 65 | MQTL<br>4D.1 | 0.7   | 1.6   | Xwmc617                 | AX-110527441                | 14.6  | 15.0  | 10 |
| 66 | MQTL<br>4D.2 | 53.6  | 53.9  | IWB16077                | Xsrap16                     | 5.6   | 49.9  | 5  |
| 67 | MQTL<br>4D.3 | 78.7  | 80.4  | Xgdm129                 | wPt2379                     | 196.6 | 484.4 | 2  |
| 68 | MQTL<br>4D.4 | 83.3  | 83.9  | AX-94881415             | AX-94383842                 | 2.7   | 492.0 | 8  |
| 69 | MQTL<br>4D.5 | 86.0  | 86.7  | Xsrap11b                | IWB62209                    | 490.9 | 499.1 | 2  |
| 70 | MQTL<br>4D.6 | 87.9  | 88.5  | AX-110418361            | Xgdm125                     | 3.4   | 12.8  | 4  |
| 71 | MQTL<br>4D.7 | 93.9  | 94.5  | Xbarc1183               | AX-94403999                 | 4.4   | 5.7   | 8  |
| 72 | MQTL<br>4D.8 | 205.4 | 206.0 | Xscs30.2.2              | Kukri_c40437_66             | 497.6 | 508.3 | 3  |
| 73 | MQTL<br>5A.1 | 8.8   | 9.5   | Xgwm0304b               | AX-95186387                 | 6.7   | 8.1   | 10 |
| 74 | MQTL<br>5A.2 | 39.0  | 42.0  | D-1206650               | XACG.GAC1.2                 | 526.6 | 528.6 | 10 |
| 75 | MQTL<br>5A.3 | 103.5 | 103.8 | Xgwm410.3               | IWB61598                    | 699.5 | 700.4 | 24 |
| 76 | MQTL<br>5B.1 | 8.6   | 8.8   | Xbarc133                | GBS_257                     | 577.9 | 713.0 | 3  |
| 77 | MQTL<br>5B.2 | 42.7  | 44.0  | wPt5168                 | IWB36196                    | 14.5  | 570.6 | 26 |
| 78 | MQTL<br>5D.1 | 9.7   | 10.9  | D-4329273               | S-1046500                   | 458.1 | 463.1 | 16 |
| 79 | MQTL<br>5D.2 | 28.1  | 28.3  | S-982589                | S-1052739                   | 481.4 | 483.1 | 5  |
| 80 | MQTL<br>5D.3 | 31.6  | 31.7  | D-4329207               | D-1116418                   | 485.5 | 486.8 | 4  |
| 81 | MQTL<br>5D.4 | 72.2  | 72.3  | IWB58798                | Xswes342a                   | 371.8 | 531.5 | 7  |



|     |              |       |       |                             |                              |       |       |    |
|-----|--------------|-------|-------|-----------------------------|------------------------------|-------|-------|----|
| 82  | MQTL<br>5D.5 | 168.3 | 173.0 | wPt1197                     | 5DL_4588938_1981             | 204.9 | 343.3 | 12 |
| 83  | MQTL<br>5D.6 | 418.1 | 432.6 | Jagger_c550_91              | JD_c4438_839                 | 406.6 | 546.7 | 6  |
| 84  | MQTL<br>6A.1 | 0.0   | 3.3   | AX-94788664                 | D_3952327                    | 16.6  | 17.6  | 3  |
| 85  | MQTL<br>6A.2 | 9.4   | 18.2  | IWB44292                    | D-2278273                    | 14.4  | 15.8  | 2  |
| 86  | MQTL<br>6A.3 | 35.3  | 35.9  | Tdurum_contig468<br>28_1430 | S_1116215                    | 571.9 | 614.2 | 9  |
| 87  | MQTL<br>6A.4 | 40.4  | 46.3  | S_1116215                   | IWB23460.2                   | 574.5 | 614.2 | 3  |
| 88  | MQTL<br>6A.5 | 57.6  | 70.3  | IWA504                      | wPt4791                      | 253.2 | 602.5 | 4  |
| 89  | MQTL<br>6A.6 | 202.0 | 235.7 | 104.172                     | Xcdo1090a                    | 1.9   | 60.4  | 2  |
| 90  | MQTL<br>6A.7 | 270.9 | 277.3 | XPaggMctg18                 | Xbarc146b                    | 1.9   | 614.7 | 5  |
| 91  | MQTL<br>6B.1 | 27.0  | 28.7  | S_1054930                   | GTG.CTT1                     | 3.5   | 698.6 | 6  |
| 92  | MQTL<br>6B.2 | 62.7  | 62.9  | Xdupw16                     | wPt745074                    | 19.5  | 648.7 | 24 |
| 93  | MQTL<br>6D.1 | 33.7  | 38.2  | AX-86177993                 | cfid13c                      | 24.0  | 89.3  | 15 |
| 94  | MQTL<br>6D.2 | 75.8  | 78.7  | BobWhite_c13435<br>700      | wPt666008                    | 213.1 | 471.0 | 8  |
| 95  | MQTL<br>6D.3 | 116.5 | 121.7 | Xfbb9b                      | AX-94381525                  | -     | -     | 5  |
| 96  | MQTL<br>6D.4 | 165.0 | 165.1 | IWB4527                     | IWB58414                     | -     | -     | 4  |
| 97  | MQTL<br>7A.1 | 57.1  | 80.6  | M103823                     | GBS_539                      | 8.8   | 12.9  | 2  |
| 98  | MQTL<br>7A.2 | 148.1 | 154.4 | tarc0748                    | gwm332                       | 42.2  | 47.4  | 3  |
| 99  | MQTL<br>7B.1 | 1.1   | 1.3   | Excalibur_c22830_<br>2010   | Excalibur_c16580_3<br>88     | 3.1   | 53.6  | 6  |
| 100 | MQTL<br>7B.2 | 14.7  | 15.0  | Kukri_c16416_647            | Xgwm1250                     | 1.1   | 6.4   | 6  |
| 101 | MQTL<br>7B.3 | 46.8  | 50.4  | wPt_0789                    | snp2273                      | 593.2 | 718.4 | 16 |
| 102 | MQTL<br>7B.4 | 78.1  | 81.8  | wPt_2592                    | D_3938216                    | 587.9 | 710.7 | 6  |
| 103 | MQTL<br>7B.5 | 92.3  | 95.8  | wPt_732048                  | wPt7368                      | 21.7  | 643.4 | 3  |
| 104 | MQTL<br>7B.6 | 231.3 | 234.5 | Xgwm0037                    | RFL_Contig4686_70<br>0       | 0.8   | 744.3 | 5  |
| 105 | MQTL<br>7D.1 | 12.7  | 20.2  | Xgwm350                     | Xgwm974                      | 22.5  | 25.4  | 7  |
| 106 | MQTL<br>7D.2 | 40.1  | 45.8  | AX-110940110                | wPt664368                    | 58.9  | 91.7  | 4  |
| 107 | MQTL<br>7D.3 | 55.3  | 64.2  | IWB6964                     | S-1162003                    | 58.9  | 526.4 | 2  |
| 108 | MQTL<br>7D.4 | 66.8  | 75.1  | Xgwm0437                    | D-1135134                    | 2.9   | 86.1  | 17 |
| 109 | MQTL<br>7D.5 | 114.9 | 121.2 | AX-110579501                | Excalibur_rep_c8301<br>9_155 | 15.8  | 135.3 | 7  |
| 110 | MQTL<br>7D.6 | 290.6 | 305.4 | CAP8_rep_c9420_<br>186      | Excalibur_rep_c8589<br>1_96  | 211.4 | 237.5 | 10 |

## MQTLs validated with GWAS results

The physical coordinates of the MQTLs identified in the present study were also compared with MTAs reported in earlier GWA studies (S6 Table). Among the 108 MQTLs, as many as 43 MQTLs (39.81 %) co-localized with at least one MTA available from the GWAS (Fig 4; S6 Table). There were some MQTLs co-localized with MTAs available from more than one GWA study. For instance, MQTL6A 7 co-located with MTAs reported in seven different GWA studies. Each of the five MQTLs (viz., 1A.1, 1B.2, 3B.4, 5B.2 and 6B.2) involving at least 20 initial QTLs co-localized with multiple MTAs reported from different GWA studies.

Surprisingly, five genes, *TraesCS1A02G040600*, *TraesCS2D02G531100*, *TraesCS3B02G449200*, *TraesCS3D02G095700* and *TraesCS3D02G096000* described by Yang et al. (2021) GWA study were overlapped with four MQTLs identified in the present study. Among them, first three genes were present in the MQTL1A.1, MQTL2D.6, and MQTL3B.1, respectively. While, last two genes located on the 3D chromosomes were present in the MQTL3D.3. Functional annotation and GO study revealed their participation in the various biological processes associated with grain quality in wheat. Genes, namely *TraesCS3D02G095700* and *TraesCS3D02G096000* encode for the wheat allergens and trypsin and alpha-amylase inhibitor present in the seeds.

## Wheat homologues of known rice genes in MQTL regions

An extensive search made on known rice genes associated with quality traits led to the collection of information on 34 genes which were further utilized for the identification of their corresponding homologues in wheat MQTL regions. These genes encode proteins/products mainly belonging to the following families: starch synthase, glycosyl transferase, aldehyde dehydrogenase, SWEET sugar transporter, alpha amylase, glycoside hydrolase, glycogen debranching, protein kinase, peptidase, legumain, and seed storage proteins. Wheat homologues of 30 of these rice genes were identified in different MQTL regions (S7 Table); wheat homologues for three rice genes, namely, *RP6*, *RMI*, and *OsAGPL4/OsAPL4* could not be identified due to low sequence identity (<60%) and query coverage (<30%). Further, it has been noticed that, wheat homologues for nine rice genes are

identified on the different chromosomes of wheat. For example, wheat homologues for rice gene, *Wx1* are present on the 4<sup>th</sup> and 7<sup>th</sup> chromosomes. Sixty-four wheat homologues of these 30 rice genes were detected in the 44 wheat MQTL regions (S7 Table); some MQTL regions harboured more than one wheat homologues of rice genes. For example, wheat homologues of rice genes *wx1*, *OsACS6* and *GBSSII* genes were present within the MQTL4A.2 (S7 Table).

## Ortho-MQTL analysis

Extensive investigation of orthologous gene models available from all the 108 wheat MQTLs (with known genomic coordinates) led to the identification of 23 wheat MQTLs (ortho-MQTLs) syntenic to 16 rice MQTLs (Fig 4; S8 Table). In some cases, more than one wheat MQTLs were found to be syntenic to a single rice MQTL. For instance, three wheat MQTLs (viz., 2B.3, 2D.2, and 2D.2) were found to be syntenic to a rice MQTL (i.e., MQTL4.5) (Figs 6 and 8). Conversely, single wheat MQTL was found to be syntenic to multiple rice MQTLs. For instance, wheat MQTL4A.4 was syntenic to two rice MQTLs located on chromosome 8 (viz., MQTL8.6 and MQTL8.8) and MQTL4B.6 was syntenic to two rice MQTLs located on chromosome 3 (MQTL3.3 and MQTL3.4).

Number of orthologous gene models in individual MQTL varied from 3 in MQTL1A.3 to 19 genes in MQTL2D.2. Five ortho-MQTLs (viz., 2A.1, 2D.2, 4D.8, 5D.1 and 7D.1) each involving more than 10 gene models syntenic to rice genome are presented in Fig 5. Gene models present in the two wheat MQTLs (viz., 2D.2 and 4D.8) located on chromosome 2D were found to be orthologous to rice MQTL4.5 and MQTL3.4, respectively, in the reverse order (Fig 5b, c). From this, it can be inferred that genomic regions in MQTL2D.2 and MQTL4D.8 were inverted once in the evolutionary time and conserved in the rice genome. MQTL5D.1 with 13 gene models was corresponding to rice MQTL3.7. Wheat genes present in MQTL5D.1 was found to be collinear to one rice MQTL3.7 (Fig 5d). We also reported a disruption in collinearity between the genes available from the wheat (MQTL7D.1) and rice (MQTL6.1) MQTLs (Fig 5e). Wheat MQTL2A.1 with 14 genes was found to be syntenic to the rice MQTL4.2 (Fig 5a).

## Gene models available in MQTL regions and their expression analysis

A total of 108 MQTLs were anchored to the physical map of wheat reference genome. Physical positions of the two MQTLs (viz., MQTL6D.3 and MQTL6D.4) could not be deduced, as these MQTLs were flanked by markers with no sequence information available. Gene mining within 108 MQTL regions permitted the identification of as many as 2533 gene models. Maximum number of gene models (276) were identified for MQTLs located on the chromosome 2A, while the minimum number of the gene models (6 gene models) were available from the MQTLs located on chromosome 6B (Table 2; S9 Table).

**Table 2.** Number of initial QTLs, projected QTLs, gene models identified in the different chromosomes

| Chromosome   | Initial number of QTLs | Projected QTLs | Unique gene models | Gene models with >2 TPM expression |
|--------------|------------------------|----------------|--------------------|------------------------------------|
| 1A           | 206                    | 113            | 262                | 52                                 |
| 1B           | 289                    | 175            | 119                | 47                                 |
| 1D           | 158                    | 86             | 116                | 25                                 |
| 2A           | 121                    | 61             | 276                | 47                                 |
| 2B           | 177                    | 64             | 88                 | 17                                 |
| 2D           | 100                    | 32             | 140                | 38                                 |
| 3A           | 90                     | 35             | 93                 | 14                                 |
| 3B           | 105                    | 48             | 79                 | 21                                 |
| 3D           | 34                     | 22             | 104                | 26                                 |
| 4A           | 124                    | 69             | 112                | 12                                 |
| 4B           | 142                    | 69             | 117                | 31                                 |
| 4D           | 49                     | 42             | 242                | 69                                 |
| 5A           | 93                     | 44             | 94                 | 18                                 |
| 5B           | 100                    | 29             | 28                 | 8                                  |
| 5D           | 94                     | 50             | 143                | 38                                 |
| 6A           | 82                     | 28             | 204                | 43                                 |
| 6B           | 94                     | 30             | 6                  | 2                                  |
| 6D           | 62                     | 32             | 54                 | 18                                 |
| 7A           | 140                    | 2              | 47                 | 7                                  |
| 7B           | 88                     | 43             | 118                | 25                                 |
| 7D           | 110                    | 47             | 91                 | 22                                 |
| <b>Total</b> | <b>2458</b>            | <b>1121</b>    | <b>2533</b>        | <b>580</b>                         |

Expression analysis of available gene models detected 556 gene models with >2 transcripts per million (TPM) expression, which included 94 gene models with >5 TPM and 6 gene models with >10 TPM expression in grains and its component tissues such as seed coat, starchy endosperm,

whole endosperm, aleurone layer and grain transfer cells in (Fig 8; S10 Table). Of these 556 gene models, 117 gene models showed constitutive expression in all the tissues studied. While, the remaining 439 gene models showed the differential expression (tissue specific). Further, 44 differentially expressed gene models with more than 5 TPM expression were involved in the improvement of grain quality (Fig 7). Based on their expression pattern, gene models could be divided into two classes, i.e., genes in class-I showed expression in the seed, while genes in the class-II exhibited expression in the different sub-tissues. Further, functional characterization of these genes revealed their involvement in transcriptional and translational regulation of various genes, signalling mechanism, metabolism, cellular development and transfer, etc.

In recent study, transcriptome analysis in the hexaploid wheat and its diploid progenitors identified the differentially expressed genes (DEGs) associated with carbohydrate metabolism [27]. Seven DEGs (Table 3) identified from Kaushik et al. (2020) study were common to the genes characterized in the present study. Of these seven genes, six genes were downregulated (Table 3) and one gene, *TraesCS7B02G194000.1* was upregulated. Among the downregulated genes, two genes were encoding for NB-ARC domain containing proteins and one gene for the F-box domain (Table 3). While the functions of the three downregulated genes were not characterized.

**Table 3.** Differentially expressed genes detected from the transcriptomic studies (Kaushik et al. 2020) which co-localized with MQTLs identified in the current study

| Sl. No. | MQTL     | Gene stable ID     | Gene position (bp)  | GO term            | Interpro Description        | Expression     |
|---------|----------|--------------------|---------------------|--------------------|-----------------------------|----------------|
| 1       | MQTL1A.1 | TraesCS1A02G041100 | 22612227-22614080   | ADP binding        | NB-ARC                      | Down-regulated |
| 2       | MQTL2A.2 | TraesCS2A02G042500 | 17025906-17033628   | ADP binding        | NB-ARC                      |                |
| 3       | MQTL2B.3 | TraesCS2B02G430500 | 619391291-619391622 | -                  | -                           |                |
| 4       | MQTL4A.5 | TraesCS4A02G316100 | 606335446-606340512 | protein binding    | F-box domain                |                |
| 5       | MQTL6A.3 | TraesCS6A02G365500 | 593732776-593733555 | -                  | -                           |                |
| 6       | MQTL7A.2 | TraesCS7A02G078900 | 44355885-44362888   | -                  | -                           | Upregulated    |
| 7       | MQTL7B.5 | TraesCS7B02G194000 | 333406094-333422302 | catalytic activity | Alpha/beta hydrolase fold-1 |                |

Cloned and characterized wheat genes associated with grain protein content (GPC) (*GPC-B1/NAM-B1*), HMW glutenin (*Glu-B1-1b*, *Glu-1D-1d*, *1Dx2t* and *Glu-1By9*) and starch synthase enzymes (*TaSSI*, *TaSSIIa*, *TaGBSSIIa* and *TaSSIVb*) were identified in the 12 MQTL regions (S11 Table). Two MQTLs (6B.1 and 6B.2) present on chromosome 6B are associated with the GPC. MQTLs lying on the chromosome 1B (1B.2, 1B.3 and 1B.4) and 1D (1D.4 and 1D5) are act as a precursor for the HMW. Genes for the starch synthase enzyme present on the 1D (MQTL1D.2) and 7D (MQTL7D.2, MQTL7D.3, MQTL7D.4 & MQTL7D.5) chromosomes are responsible for the amylopectin biosynthesis via  $\alpha$ -1,4-glycosidic linkages. Present study has also identified the 165 genes associated with catechol oxidase activity and metal ion binding (related PPO), Zn-transporter and zinc-binding site (Zn and Fe content), Small hydrophilic plant seed protein, Amino acid transporter and seed storage helical domain (seed storage protein), sweet-sugar transporters, UDP-glucuronosyl/UDP-glucosyltransferase and Sugar/inositol transporter (starch content) etc. Among them, 44 genes had the expression value of more than two TPM and were regarded as the putative CGs (Table 4). All the six CGs, *TraesCS3D02G095700*, *TraesCS3D02G096000*, *TraesCS4B02G017500*, *TraesCS4D02G016000*, *TraesCS4D02G016100* and *TraesCS6D02G000200* having high expression value of >10 TPM were showed to be involved in improving the seed quality through nutrient reservoir activity.

**Table 4.** High-confidence candidate genes with >5 TPM expression identified in the present study

| Sl. No. | MQTL No.  | Gene stable ID      | Gene start (bp) | Gene end (bp) | GO term name       | Interpro Description                    | Expressi on (in TPM) |
|---------|-----------|---------------------|-----------------|---------------|--------------------|-----------------------------------------|----------------------|
| 1       | MQTL 1A.2 | TraesCS1A02 G060100 | 41357284        | 41362423      | peptidase activity | Peptidase C13, legumain                 | >2                   |
| 2       | MQTL 1A.7 | TraesCS1A02 G062500 | 42670658        | 42671830      |                    | seed storage helical domain superfamily | >5                   |
| 3       | MQTL 1A.7 | TraesCS1A02 G062700 | 42695416        | 42698084      |                    | seed storage helical domain superfamily | >5                   |
| 4       | MQTL 1A.7 | TraesCS1A02 G062900 | 42721261        | 42721834      |                    | seed storage helical domain superfamily | >5                   |
| 5       | MQTL 1A.5 | TraesCS1A02 G224000 | 394325250       | 394328538     |                    | Peptidase M24                           | >5                   |
| 6       | MQTL 1A.5 | TraesCS1A02 G224200 | 394482047       | 394482797     | cytosol            | Small hydrophilic plant seed protein    | >5                   |
| 7       | MQTL 1A.5 | TraesCS1A02 G224600 | 394587930       | 394588284     | cytosol            | Small hydrophilic plant seed protein    | >5                   |
| 8       | MQTL      | TraesCS1B02         | 48154049        | 48154256      | nucleus            | NAC domain                              | >2                   |

|    | 1B.6      | G274300             | 9         | 4         |                                                   |                                                          |     |
|----|-----------|---------------------|-----------|-----------|---------------------------------------------------|----------------------------------------------------------|-----|
| 9  | MQTL 1B.1 | TraesCS1B02 G407800 | 634934360 | 634934858 |                                                   | seed storage helical domain                              | >2  |
| 10 | MQTL 1D.4 | TraesCS1D02 G317300 | 412223432 | 412224112 | IgE binding                                       | seed storage helical domain                              | >5  |
| 11 | MQTL 1D.2 | TraesCS1D02 G346100 | 433899291 | 433905345 | metal ion binding                                 | Peptidase M16, zinc-binding site                         | >2  |
| 12 | MQTL 2A.1 | TraesCS2A02 G028400 | 12990103  | 12992210  | transferase activity, transferring hexosyl groups | UDP-glucuronosyl/UDP-glucosyltransferase                 | >2  |
| 13 | MQTL 2A.1 | TraesCS2A02 G028500 | 13002991  | 13004793  | transferase activity, transferring hexosyl groups | UDP-glucuronosyl/UDP-glucosyltransferase                 | >5  |
| 14 | MQTL 2A.6 | TraesCS2A02 G081100 | 36700022  | 36701587  | transferase activity, transferring hexosyl groups | UDP-glucuronosyl/UDP-glucosyltransferase                 | >2  |
| 15 | MQTL 2B.3 | TraesCS2B02 G430900 | 619754863 | 619757940 | serine-type carboxypeptidase activity             | Peptidase S10, serine carboxypeptidase                   | >2  |
| 16 | MQTL 2D.4 | TraesCS2D02 G382400 | 486390272 | 486392935 | peptidase activity                                | Peptidase C13, legumain                                  | >5  |
| 17 | MQTL 3A.4 | TraesCS3A02 G408200 | 653303151 | 653306203 | integral component of membrane                    | SWEET sugar transporter                                  | >2  |
| 18 | MQTL 3A.3 | TraesCS3A02 G446200 | 686762258 | 686767701 | serine-type carboxypeptidase activity             | Peptidase S10, serine carboxypeptidase                   | >2  |
| 19 | MQTL 3B.2 | TraesCS3B02 G059300 | 31058376  | 31059986  | hydrolase activity                                | Peptidase C26                                            | >2  |
| 20 | MQTL 3B.2 | TraesCS3B02 G059500 | 31066580  | 31068297  | hydrolase activity                                | Peptidase C26                                            | >2  |
| 21 | MQTL 3D.3 | TraesCS3D02 G095700 | 48543331  | 48543795  | serine-type endopeptidase inhibitor activity      | Cereal seed allergen/trypsin and alpha-amylase inhibitor | >10 |
| 22 | MQTL 3D.3 | TraesCS3D02 G096000 | 48732052  | 48732516  | serine-type endopeptidase inhibitor activity      | Cereal seed allergen/trypsin and alpha-amylase inhibitor | >10 |
| 23 | MQTL 3D.3 | TraesCS3D02 G096500 | 48836328  | 48842240  | integral component of membrane                    | Amino acid/polyamine transporter I                       | >2  |
| 24 | MQTL 3D.1 | TraesCS3D02 G514700 | 598160861 | 598163274 | transferase activity, transferring hexosyl groups | UDP-glucuronosyl/UDP-glucosyltransferase                 | >2  |
| 25 | MQTL 4B.1 | TraesCS4B02 G017500 | 13052500  | 13054709  | nutrient reservoir activity                       | Cupin 1                                                  | >10 |
| 26 | MQTL      | TraesCS4B02         | 13077784  | 13080425  | nutrient                                          | Cupin 1                                                  | >5  |



|    |           |                     |           |           |                                                     |                                                          |     |
|----|-----------|---------------------|-----------|-----------|-----------------------------------------------------|----------------------------------------------------------|-----|
|    | 4B.1      | G017600             |           |           | reservoir activity                                  |                                                          |     |
| 27 | MQTL 4B.1 | TraesCS4B02 G020000 | 14117806  | 14125905  | zinc ion binding                                    | Peptidase M1, alanine aminopeptidase                     | >2  |
| 28 | MQTL 4B.6 | TraesCS4B02 G196600 | 423357718 | 423362900 |                                                     | Alpha/beta hydrolase fold-1                              | >2  |
| 29 | MQTL 4D.6 | TraesCS4D02 G016000 | 7182216   | 7204066   | nutrient reservoir activity                         | Cupin 1                                                  | >10 |
| 30 | MQTL 4D.6 | TraesCS4D02 G016100 | 7203800   | 7206343   |                                                     | Cupin 1                                                  | >10 |
| 31 | MQTL 4D.6 | TraesCS4D02 G017700 | 7826751   | 7834962   | zinc ion binding                                    | Peptidase M1, alanine aminopeptidase                     | >2  |
| 32 | MQTL 4D.2 | TraesCS4D02 G051100 | 26933336  | 26934958  |                                                     | Alpha/beta hydrolase fold-1                              | >2  |
| 33 | MQTL 4D.5 | TraesCS4D02 G336100 | 494050540 | 494057878 | integral component of membrane                      | Sugar/inositol transporter                               | >2  |
| 34 | MQTL 4D.5 | TraesCS4D02 G337300 | 494829139 | 494833871 | serine-type carboxypeptidase activity               | Peptidase S10, serine carboxypeptidase                   | >2  |
| 35 | MQTL 4D.8 | TraesCS4D02 G350300 | 502576795 | 502579734 | integral component of membrane                      | Peptidase S54, rhomboid                                  | >2  |
| 36 | MQTL 4D.8 | TraesCS4D02 G350700 | 502747671 | 502751833 |                                                     | Alpha/beta hydrolase fold-1                              | >2  |
| 37 | MQTL 5D.4 | TraesCS5D02 G381000 | 451173705 | 451179099 |                                                     | Peptidase S1, PA clan                                    | >2  |
| 38 | MQTL 5D.4 | TraesCS5D02 G381200 | 451542024 | 451547417 |                                                     | Peptidase S1, PA clan                                    | >2  |
| 39 | MQTL 6A.4 | TraesCS6A02 G370300 | 595182823 | 595186561 | hydrolase activity, acting on carbon-nitrogen bonds | Acetamidase/Formamidas                                   | >5  |
| 40 | MQTL 6D.4 | TraesCS6D02 G000200 | 52444     | 52899     | serine-type endopeptidase inhibitor activity        | Cereal seed allergen/trypsin and alpha-amylase inhibitor | >10 |
| 41 | MQTL 6D.1 | TraesCS6D02 G091300 | 57107880  | 57116429  | serine-type endopeptidase activity                  | Peptidase S9, prolyl oligopeptidase                      | >2  |
| 42 | MQTL 7B.5 | TraesCS7B02 G193800 | 332923582 | 332926431 | integral component of membrane                      | Diacylglycerol acyltransferase                           | >2  |
| 43 | MQTL 7D.2 | TraesCS7D02 G121200 | 75330927  | 75337847  | serine-type peptidase activity                      | Peptidase S9, prolyl oligopeptidase, catalytic domain    | >2  |
| 44 | MQTL 7D.2 | TraesCS7D02 G121900 | 75930917  | 75945541  | serine-type endopeptidase activity                  | Peptidase S8/S53 domain                                  | >2  |

## Discussion

Discovery of molecular markers and advancements in QTL mapping strategies have promoted the plant researchers across the globe to underpin the complex genetic architecture of quality traits in wheat [2]. Results of these intensive studies has accrued a large number of QTLs controlling the quality traits in wheat. Majority of these QTLs are minor QTLs (with low PVE value) and have larger CI, making them unsuitable for the marker assisted plant breeding [23]. Further, it has been observed that, QTLs identified from one population may not be effective for a breeding programme involving the other population [25]. Downsides of these QTLs promoted us to reanalyze all of these loci together, with the goal of fine-tuning this vast amount of data, so that breeders and researchers can make greater use of these QTLs.

Meta-QTL analysis has the great capability to compile the information from multiple QTL mapping studies involving diverse environments with different genetic backgrounds to identify stable and reliable MQTLs with reduced CI [28]. MQTL analysis have already conducted for the major crops including the rice, wheat, maize, etc. [2,25,29]. Meta-QTL analysis for agronomic and quality traits in wheat has identified the six MQTLs for GPC and eight MQTLs for baking quality from the initial pool of 155 QTLs involving eight genetic studies published before 2013 [2]. Further, seven MQTLs associated with Zn and Fe content were identified from initial set of 50 QTLs involving seven independent segregating populations. These studies have employed a small number of initial QTLs for the meta-analysis. However, the results of MQTL analysis have been found to be significantly and positively correlated with the quality of the results of meta-analysis [2,25]. Furthermore, as molecular genetics and QTL mapping methodologies are advancing, novel QTLs are adding to the database on a regular basis, therefore we must keep up with this pace in order to integrate new QTLs into more stable and reliable MQTLs.

Thus, to supplement the previous studies [2], in the present study, we conducted the meta-analysis for the QTLs reported during 2013-20 by projecting very large number of initial QTLs (1986 QTLs) on the high-density consensus map and identified 110 MQTLs each involving at least two

initial QTLs. In addition to Zn, Fe, GPC and baking quality (studied by Quraishi et al. 2017), the present study also considered the other important quality parameters such as starch, PPO, Ax content, bread making properties, etc.

From the breeding perspectives, it is noteworthy to identify the most stable and reliable MQTLs involving a greater number of initial QTLs identified across the different populations and environments. Eleven such MQTLs involving more than 20 initial QTLs were detected in the present study. One MQTL located on chromosome 1B (MQTL1B.1) included as many as 85 initial QTLs, which is much higher than earlier study of [2]. Further, to reduce the confidence interval, meta-QTL analysis relies on a large number of initial QTLs and heterogeneous populations [31]. Present study aggregated a vast QTL information from multiple genetic backgrounds and efficiently reduced the CI of the QTLs, thereby improved the accuracy of candidate gene prediction from the important QTL regions. The average CI of MQTL was 18.84-fold less than that of initial QTLs, and there were significant differences among different chromosomes. Some of the MQTLs with reduced CI identified in the present study may lay the foundation for molecular cloning and functional characterization of genes associated with quality traits in wheat. Further, this may offer the possibilities for the marker assisted gene transfer across the populations and contribute to the wheat quality improvement.

## **Validating MQTLs with GWAS-MTAs**

Genome wide association studies (GWAS) is a powerful tool which allows the investigation of highly complex characters by exploiting the recent and historical recombinant events present in the natural populations and permits the high-resolution mapping [32]. High-throughput, low-cost sequencing technologies have helped to identify MTAs for many quality traits in natural populations of wheat [33,34]. In the present study, 39.81% (43/108) of the identified MQTLs were verified by the GWAS-MTAs, which is in agreement with the earlier reports on the comparison of MQTLs with MTAs [25,35]. It is indicated from the previous studies [25,35] and the present study, that, only a part of the MQTL region could be verified by the MTAs. Considering this, we propose the following two hypothesis: (i) none of the approaches whether meta-QTL analysis or GWAS approach included all

the genetic variation present in the crop species, and (ii) genetic materials used in the two approaches were entirely different from each other. MQTLs could be considered more stable and consistent, if they are validated by more than one GWA study and also included the large number of initial QTLs from independent experiments. Five such MQTLs (1A.1, 1B.2, 3B.4, 5B.2 and 6B2) with more than 20 initial QTLs were verified with multiple MTAs derived from different GWA studies. These MQTL regions may be further investigated to explore the underlying complex genetics of the quality traits.

More interestingly, five genes identified in the wheat multi-locus GWA study [25] were co-localized with four MQTLs detected in the current study. These genes are known to take active participation in the various biological processes to improve the grain quality in the wheat. For instance, gene, *TraesCS1A02G040600* encodes the cupin superfamily proteins such as phosphoglucose isomerase (PGI), which in turn takes part in the non-enzymatic protein storage in plant seeds [36]. Genes, *TraesCS3D02G095700* and *TraesCS3D02G096000* encode for the wheat allergens and trypsin & alpha-amylase inhibitor, respectively. Wheat allergens such as seed storage proteins (glutelin and prolamins) causing celiac disease may reduce the nutritional value of wheat seeds. Creating the null mutants for such genes through RNAi or CRISPR-CAS9 may reduce such allergic compounds present in the seeds [37]. Alpha-amylase inhibitors prevent the hydrolysis of storage starch granules present in the endosperm and there by maintain the integrity of starch in the seeds [38].

## **Ortho-MQTL mining: revealing conserved genomic regions between wheat and rice**

Identification of ortho-MQTLs among the related crop species may provide a better understanding of genes controlling various quality characters with similar evolutionary lineage and conserved functions. Further, this may provide potential opportunities to transfer information from one species to another [23,39]. Ortho-MQTL analysis have been sparingly conducted in wheat, with only three studies are available for different studies including, nitrogen-use efficiency and related traits [2,23] and thermotolerance [21]. However, to our knowledge, no study has reported the ortho-MQTLs

for the quality related traits in wheat and other cereals so far. This is the first report, where we identified the 23 ortho-MQTLs associated with quality traits conserved between wheat and rice. Functional characterization of gene models present in the wheat ortho-MQTLs revealed their associations with the sugar-phosphate transportation, seed storage protein, lipid storage activities, etc. Wheat gene, *TraesCS1B02G248000* present on the ortho-MQTL1B.4 is belonging to the NAC domain family and is associated with improving the GPC in wheat seeds. Corresponding orthologous rice gene, *BGIOSGA019745* located on MQTL5.6 belongs to the same gene family and is associated with improving the seed size [40]. Further, *TraesCS2B02G430300* gene present on the ortho-MQTL2B.3 is belonging to hydrophobic seed protein domain which accumulates hydrophobic proteins (HPS) on the seed surface. HPS are the abundant seed constituent and a potentially hazardous allergen that causes asthma in persons allergic to the crop dust [41]. Phenotypic or genetic screening may be devised to select plants with reduced amounts of HPS on the seed surface and may offers new avenue for lessening the health hazard of seed dust exposure. Orthologue for this gene, *BGIOSGA016898* is present on the rice MQTL4.5 and is belong to the same class of protein domain. Exploring of such conserved genomic regions among related species may unravel the common regulatory pathways and may assist the utilization of genomic resources from the model species, which may greatly contribute to the rapid crop improvement.

## Candidate genes available in MQTL regions

MQTLs are considered as the potential targets for mining candidate genes (CGs) associated with the traits in question. Further, MQTL regions have been shown to have high correlation with gene density in genome as revealed by earlier reports on meta-QTL studies conducted in different crops including rice, wheat, and maize [2,10,25]. In wheat, previous studies have reported 15,772 gene models for yield, baking quality and grain protein content [2], 324 gene models for Fusarium head blight [16], 228 gene models for drought [21], and 237 gene models [25] for yield related traits. In the present study, gene mining within 108 MQTLs identified 2533 gene models in wheat, at least some of them are known to be associated with quality traits.

Gene expression analysis is the study of how genes are transcribed to produce functional gene products, such as RNA or protein. *In silico* expression analysis permitted the identification of gene models with more than 2 TPM expression. An extensive survey of literature revealed their involvement in transcriptional and translation regulation of different genes, signalling mechanism, metabolism, cellular development and transfer etc. (Table. S7). In the present study, ABC transporter genes were identified on chromosomes 1A, 2A, 2B, 4A, 4B, 6D and 7B, which may give opportunity to develop nutritionally enriched, high-yielding *wheat* cultivars. ABC type transporters are known to regulate seed weight, by transcriptional regulation and modulation of the transport of glutathione conjugates in chickpea [42]. Along with seed weight, they may enhance the quality component traits, as reported in chickpea [42]. Ammonium transporter genes available in MQTL6A.5 may play a crucial role in the transport of seed nitrogen (N) and metabolic processes for seed N accumulation, seed yield and N use efficiency (NUE) [43]. They take part in increasing the level of specific amino acids, total soluble protein, and specific high-quality proteins in the seeds. Overall, the present study identified at least 165 gene models associated with catechol oxidase activity and metal ion binding (related PPO), Zn-transporter and zinc-binding site (Zn and Fe content), small hydrophilic plant seed protein, amino acid transporter and seed storage helical domain (seed storage protein), sweet-sugar transporters, UDP-glucuronosyl/UDP-glucosyltransferase, sugar/inositol transporter (starch content) etc. which are known to be associated with quality related traits in different crops. 44 of these 165 gene models with functions previously reported to be important for quality related traits in different crops were selected and recommended for future basic studies involving cloning and functional characterization.

Gene expression analysis of hexaploid bread wheat through RNA-seq and the GeneChip®Wheat Genome array identified numerous DEGs related to starch biosynthesis, nutrient reservoir activity, carbohydrate metabolism and seed storage protein synthesis [27]. Seven DEGs identified in [27] study were co-located with some MQTLs identified on following 7 chromosomes 1A, 2A, 2B, 4A, 6A, 7A and 7B in the present study. Of these seven genes, six genes were downregulated and one gene, *TraesCS7B02G194000.1* was upregulated. Among the downregulated

genes, two genes encode for NB-ARC domain containing proteins and one gene for the F-box domain (Table 3). While the functions of the three downregulated genes have not been characterized. Up-regulated gene, *TraesCS7B02G194000* encode the alpha/beta hydrolase enzyme which take part in the multitude of biochemical processes, including bioluminescence, fatty acid and polyketide biosynthesis and metabolism [44].

To strengthen the location of MQTLs identified in this study, a search for co-localization of quality related genes was also carried out. This enabled detection of functionally characterized wheat genes such as, *GPC-B1/NAM-B1*, *Glu-B1-1b*, *Glu-1D-1d*, *1Dx2t*, *Glu-1By9*, *TaSSI*, *TaSSIIa*, *TaGBSSIa* and *TaSSIVb* in different MQTL regions. MQTL6B.1 and MQTL6B.2 were identified to be associated with the GPC, which may also take part in the nutrient remobilization from leaves to developing grains [45]. Genomic regions underlying the five wheat MQTLs, (viz., 1B.2, 1B.3, 1B.4, 1D.4 and 1D.5) carried some known genes which are the known precursors of HMW glutenin, a prime deciding factor for determining the dough elasticity and bread-making quality in wheat [46]. Genes for the starch synthase enzyme available from MQTL1D.2, 7D.2, 7D.3, 7D.4 and 7D.5 regions are responsible for the amylopectin biosynthesis via  $\alpha$ -1,4-glycosidic linkages. Amylopectin-A is the unique chemical compounds present in the wheat which trigger the low-density lipoproteins, which take part in the transportation and delivery of fatty acids, triacylglycerol, and cholesterol in many plant organs [47].

## **Wheat homologues of known rice genes available in MQTL regions**

Comparative genomics study of wheat with model grasses such as rice has revolutionized the molecular genetics and contributed to the wheat improvement by identifying the linkage blocks, gene rearrangements and conserved regions in the wheat [21]. Functionally characterized rice genes are known to have similar function in the wheat and their homologues have been identified to be co-located with MQTLs for the various traits [48]. For instance, in the present study, three wheat homologues of one rice genes (*OsSWEET4*) were identified in different MQTLs located on



homoeologous group 2 chromosomes, these wheat homologues may be engaged in the embryo nourishment by supplying the sufficient amount of nutrients to the developing embryo in the wheat [49].

Using comparative genomics, homologues of these genes in wheat can be characterized, and functional markers for these genes can be developed and validated. A meta-analysis of QTLs associated with grain weight in tetraploid wheat, for instance, resulted in the identification of one important locus, mQTL-GW-6A on chromosome 6A [50]. Within this MQTL region, authors discovered and characterized a wheat homologue of the rice gene, *OsGRF4* [50]. This suggests that combining a MQTL study with a well-annotated genome can result in the rapid identification of CGs underlying traits of interest. Manipulation and integration of these genes in the breeding programme may contribute to the enhanced wheat quality.

## Conclusion

Meta-analysis of QTLs and comparative genomic approaches helped us to dissect the complex genetic architecture underlying various quality parameters such as GPC, total starch, Zn, Fe, PPO, baking and bread making properties in the wheat. Identified MQTLs and corresponding high-confidence CGs may enhance the marker assisted breeding for quality improvement in wheat. Molecular cloning and functional characterization of these CGs may further improve the understanding of wheat genetics. Ortho-MQTLs identified in this study may help to understand the common evolutionary pathways underlying the quality traits. Breeders across the globe can make use of most promising MQTLs (viz., 2D.2, 5A.2, 5D.4, and 7B.3) associated with multiple quality traits and CGs in their study to improve the quality related traits in wheat.

## Material and methods

### Bibliographic search and QTL data cumulation

A comprehensive bibliographic search and data retrieval on the published papers from 2013 to 2020 enabled us to compile information from the available studies. From each independent study, the following information was obtained: (i) QTL name (wherever available), (ii) flanking or closely linked markers, (iii) peak position and CI, (iv) LOD score, (v) phenotypic variation explained (PVE) or  $R^2$  value for each QTL and (vi) type and size of the mapping population (S1 and S2 Tables). Wherever, information about the peak position of the QTL was missing, it was calculated as the mid-point of the two markers flanking the QTL, and when LOD scores of individual QTLs were unavailable from a particular study, LOD score of 3 was considered for all the QTLs identified in the concerned study.

All the quality traits were grouped into the following six major trait categories: (i) *Arabinoxylan (Ax)* recorded as total Ax, sucrose solvent retention capacity (SRC), sucrose softness equivalent SRC, water-extractable and water-unextractable Ax; (ii) *Dough rheology properties (DRP)* recorded as mixolab, mixograph, mixogram, alveograph, farinograph, water SRC, alkaline SRC, dough mixing, and pasting properties; (iii) *Nutritional traits (NT)* recorded as lipoxygenase activity, yellow pigment, Fe, Zn,  $\beta$ -glucan, protein, and starch content; (iv) *Polyphenol content (PPO)* recorded as polyphenol oxidase activity, flour colour, and loaf colour; (v) *Processing quality traits (PQT)* recorded as milling and baking qualities; and (vi) *Sedimentation volume (SV)* recorded as SV, sedimentation rate and zeleny SV (S3 Table).

## Construction of consensus map

An R package LPmerge [51] was used to construct a consensus map (named as Wheat\_Reference\_GeneticMap-2021) by merging the following linkage maps: “Wheat\_Composite\_2004” (<http://wheat.pw.usda.gov>), “Wheat\_Consensus\_SSR\_2004” [52]; “Durum wheat integrated map” [53]; and four SNP array based maps developed using “Illumina 9K iSelect Beadchip Array” [54], “Illumina iSelect 90K SNP Array” [13], “Wheat 55K SNP array” [55] and “AxiomR, Wheat 660K SNP array” [56]. Markers flanking the initial QTLs identified from different mapping studies were also integrated on to the consensus map (S4 Table).

## QTL Projection, meta-QTL and ortho-MQTL analysis

For the QTLs with no CI available, CI (95%) was calculated by using the following population-specific equations [16,57].

For RIL,

$$CI (95\%) = \frac{163}{Population\ size} \times R^2$$

For DH,

$$CI (95\%) = \frac{287}{Population\ size} \times R^2$$

Further, careful examination and evaluation of individual QTLs for genetic map or QTL-related information led us to exclude 472 QTLs from the further analysis. Information on LOD score, PVE, genetic position (i.e., CI and peak position) from the remaining 1986 QTLs were compiled and used for projection on consensus map using the QTLProj tool of BioMercator V4.2. Meta-analysis was then performed for the individual chromosomes using Veyrieras two-step approach available in the software. In the first step, the best QTL model (used to ascertain the number of MQTL per chromosome) were computed by using the following five criteria: (i) Akaike Information Criterion (AIC), (ii) corrected Akaike Information Criterion (AICc), (iii) Akaike Information Criterion 3 (AIC3), (iv) Bayesian Information Criterion (BIC) and (v) Approximate Weight of Evidence Criterion (AWE). QTL model which had the least criterion value and zero delta value was considered as the best model for the analysis. In the second step, selected model was considered to determine the number of MQTLs on each chromosome (based on number of input QTLs on common genetic map), their consensus positions (based on variance of input QTL positions) and 95% CI (based on variance of input QTL intervals) [58].

To investigate the ortho-MQTLs for quality characters, a previous meta-QTL study [59] conducted in rice for starch pasting properties was used. To mine the ortho-MQTLs between wheat and rice, orthologous regions between the two species were investigated by using EnsemblPlants database. Candidate genes available in selected MQTL regions were used to search the corresponding rice genes. MQTL regions with at least 4 conserved genes present in wheat and rice genome were considered as the ortho-MQTL [59].

## **Delineating physical location and candidate gene mining in MQTL regions**

Nucleotide sequences of the markers flanking the MQTLs were retrieved from either of the following databases/websites: (i) the GrainGenes (<https://wheat.pw.usda.gov/GG3>), (ii) Diversity array technology (<https://www.diversityarrays.com>) and (iii) CerealsDB (<https://www.cerealsdb.uk.net/cerealgenomics/CerealsDB/indexNEW.php>). These sequences were used to obtain the physical positions of markers by BLASTN searches against Wheat Chinese Spring IWGSC RefSeq v1.0 genome assembly available in EnsemblPlants database (<http://plants.ensembl.org/index.html>). Physical positions of some of the SNP markers were directly obtained from the JBrowse-WHEAT URGI database (<https://urgi.versailles.inra.fr/jbrowseiwgsc/>).

Peak physical positions of MQTLs were calculated by using the following formula:

$$Peakphysicalposition(bp) = Physicalstart(bp) + \frac{(Physicalstart - Physicalend)}{(Geneticstart - Geneticend)} \times \frac{CI(95\%)}{2}$$

Gene models available in 2 Mb genomic region i.e., 1 Mb region on either side of the MQTL peak position were retrieved using the 'BioMart' tool of EnsemblPlant database (<https://plants.ensembl.org/biomart/>). Functional characterization and gene ontology (GO) analysis for available gene models was also carried out using the same tool BioMart.

## **Expression analysis for gene models**

An adaptable platform to create a gene expression interface ‘Wheat expression browser’ powered by expVIP was used to analyse the expression of gene models available in the MQTL regions [60]. Following relevant gene expression datasets: (i) grain tissue-specific developmental time course (CS grain, grain dissection, early grain) [29,61,62]; (ii) grain tissue-specific expression at 12 days post anthesis [63] and (iii) grain developmental time course with 4A dormancy QTL [64] were used for this purpose. These studies provided the expression data on “morphological stages of developing wheat grain”, “inner pericarp, outer pericarp and endosperm layers from developing grain of bread wheat at 12 days post-anthesis”, “aleurone and starchy endosperm tissues of the wheat seed at aleurone layer development time of 6, 9 and 14-days post anthesis” and “candidate genes underlying the grain dormancy in wheat”, respectively.

Only the gene models with  $\geq 2$  TPM (transcripts per million) expression were considered in the present study [65]. Further, protein sequences of the known genes associated with quality traits (collected from the literature) were retrieved and BLASTP searches were made against the wheat genome database available in EnsemblPlants to find their physical positions. Then, the physical positions of these genes were compared with the physical coordinates of the MQTLs to determine their co-localization, if any.

## **Validating MQTLs with MTAs identified in earlier GWA studies**

Information from the 11 independent GWA studies on most stable and significant MTAs were collected to validate the MQTLs identified in the present study. These GWA studies involved one durum wheat population (with population size 194), four spring wheat populations (with population size ranging from 189 to 2038), three winter wheat populations (with population size ranging from 267 to 1325) and three mixed population of spring and winter wheat (with population size ranging from 163 to 4095). Physical positions of each significant and stable SNPs associated with the trait were obtained from the respective studies and/or JBrowse-WHEAT URGI database (<https://urgi.versailles.inra.fr/jbrowseiwgsc/>). Finally, physical positions of these MTAs were

compared with the physical coordinates of the MQTLs, to find any MQTL co-localizing with at least one MTA and such MQTLs were considered as a GWAS-validated/verified MQTL.

## MQTL characterization using cloned genes from the rice

Functionally validated rice genes associated with quality traits (involving starch and protein metabolism, embryo and endosperm development, sugar transportation, grain development, etc.) were collected from the available literature and their protein sequences were retrieved from the Rice Annotation Project Database (rap-db) (<https://rapdb.dna.affrc.go.jp/index.html>). The protein sequences of rice genes were then BLAST against wheat genome to identify their corresponding wheat homologues available in the MQTL regions.

## Figures

**Fig 1.** Salient features of the initial QTLs.

(a) number of QTLs available from different chromosomes, (b) sizes of the populations utilized for mapping, (c) number of different types of populations, (d) different types of markers utilized for mapping, (e) methods employed for mapping, (f) PVE, (g) LOD, and (h) peak positions of the QTLs.

**Fig 2.** Consensus map, “Wheat\_Reference\_GeneticMap-2021” showing the marker density (number of markers/cM), chromosome length (cM) and number of markers in each chromosome.

**Fig 3.** Characteristic features of the MQTLs.

(a) distribution of MQTLs identified on different wheat chromosomes, (b) trait-wise distribution of the MQTLs, (c) average CIs of initial QTLs and MQTLs and fold reduction in CI values after meta-QTL analysis, (d) different number of QTLs involved in MQTLs, (e) MQTLs associated with different number of traits.

**Fig 4.** Distribution of different MQTLs on wheat chromosomes. Explanation for different colours utilized to represent the MQTLs are given at the bottom of the figure.

**Fig 5.** The syntenic region of MQTLs between the wheat and rice. The genomic position, chromosome number, and common genes between the wheat and rice are indicated.

**Fig 6.** Circular diagram representing the conserved regions between wheat and rice MQTLs.

**Fig 7.** Expression pattern of 44 high-confidence candidate genes in the different relevant tissues.

**Fig 8.** Circular diagram showing the different features of QTLs and MQTLs

(A) number of QTLs for each trait in each MQTL (i.e., Ax, PPO, SV, DRP, nutritional traits, processing quality traits) and number of traits in each MQTL, (B) chromosome wise distribution of initial number of QTLs, projected QTLs, average confidence interval (CI) of MQTLs and average CI of initial QTLs, (C) number of initial QTLs projected on each of the MQTL, (D) MQTLs colocalized with known wheat genes, GWAS-MTAs and functionally characterized rice genes, (E) Gene density distribution in the MQTL regions, (F) expression pattern of candidate gene models with >2 TPM in the 8 different tissues (i.e., whole grain, whole endosperm, starchy endosperm, aleurone layer, seed coat, starchy endosperm + seed coat, transfer cells and aleurone layer + starchy endosperm), (G) syntenic region between wheat and rice MQTLs. Outer circle represents the physical maps of wheat and rice chromosomes (wheat chromosomes 1A to 7D and rice chromosomes R1 to R9).

## Supporting information

S1 Table. List of identified QTLs from the 50 (63 populations) independent studies and the related information (QTLs highlighted with yellow colour have not been used for MQTL analysis)

S2 Table. Summary of the individual QTL mapping studies utilized in the present study

S3 Table. Traits grouped into different major trait categories

S4 Table. Wheat\_Reference\_GeneticMap-2021

S5 Table. Details on identified MQTLs detected in the present study

S6 Table. MQTLs co-located with MTAs identified in the earlier GWA studies



S7 Table. Wheat homologues of known rice genes identified in different MQTLs located on sub-genomes A, B and D

S8 Table. Ortho-MQTLs identified between wheat from rice

S9 Table. Details on gene models identified in the present study

S10 Table. List of important gene models and their expression pattern in different tissues (MQTLs in black had >2 TPM, MQTLs in red had >5 TPM, and MQTLs in blue had >10 TPM expressions

S11 Table. Functionally characterized wheat genes co-localized with MQTLs identified in the current study

## **Declarations**

## **Funding**

No external funding was received for this study.

## **Conflicts of interest**

The authors of this manuscript declare no conflicts of interest.

## **Availability of data and material**

Relevant data are included in this paper and its associated Supplementary Information (SI).

## **Code availability**

Not applicable

## **Author's contribution (SG, DKS, GS, PH, MS, MJT, PK, AS)**

AS, SG, and DKS conceived and planned this study. SG, PH, MJT, and PK performed the literature search, retrieved data, developed consensus map, conducted meta-analysis. GS, DKS and MS helped SG in the analysis and interpretation of results and in writing of the first draft of the manuscript. AS, DKS and GS critically revised and edited the manuscript. All authors have read and agree to the final version of the manuscript.

## **ORCID**

**Santosh Gudi:** 0000-0003-1885-8139

**Gurjeet Singh:** 0000-0002-9995-612X

## Ethics approval and consent to participate

Not applicable.

## Consent to participate

Not applicable.

## Consent for publication

Not applicable

# References

1. Nuttall JG, O’Leary GJ, Panozzo JF, Walker CK, Barlow KM, Fitzgerald GJ. Models of grain quality in wheat—A review. *F Crop Res.* 2017;202: 136–145. doi:10.1016/J.FCR.2015.12.011
2. Quraishi UM, Pont C, Ain QU, Flores R, Burlot L, Alaux M, et al. Combined genomic and genetic data integration of major agronomical traits in bread wheat (*Triticum aestivum* L.). *Front Plant Sci.* 2017;8. doi:10.3389/FPLS.2017.01843/FULL
3. Doerge RW. Mapping and analysis of quantitative trait loci in experimental populations. *Nat Rev Genet.* 2002;3: 43–52. doi:10.1038/NRG703
4. Powell W. Environmental and Genetical Aspects of Pollen Embryogenesis. 1990; 45–65. doi:10.1007/978-3-642-61499-6\_2
5. Mann G, Diffey S, Cullis B, Azanza F, Martin D, Kelly A, et al. Genetic control of wheat quality: Interactions between chromosomal regions determining protein content and composition, dough rheology, and sponge and dough baking properties. *Theor Appl Genet.* 2009;118: 1519–1537. doi:10.1007/S00122-009-1000-Y
6. Huang XQ, Cloutier S, Lycar L, Radovanovic N, Humphreys DG, Noll JS, et al. Molecular detection of QTLs for agronomic and quality traits in a doubled haploid population derived from two Canadian wheats (*Triticum aestivum* L.). *Theor Appl Genet.* 2006;113: 753–766. doi:10.1007/S00122-006-0346-7
7. McCartney CA, Somers DJ, Lukow O, Ames N, Noll J, Cloutier S, et al. QTL analysis of quality traits in the spring wheat cross RL4452 x “AC domain.” *Plant Breed.* 2006;125: 565–

575. doi:10.1111/J.1439-0523.2006.01256.X
8. Fofana B, Humphreys DG, Rasul G, Cloutier S, Brûlé-Babel A, Woods S, et al. Mapping quantitative trait loci controlling pre-harvest sprouting resistance in a red x white seeded spring wheat cross. *Euphytica*. 2009;165: 509–521. doi:10.1007/S10681-008-9766-6
9. Mohler V, Albrecht T, Mrva K, Schweizer G, Hartl L. Genetic analysis of falling number in three bi-parental common winter wheat populations. *Plant Breed*. 2014;133: 448–453. doi:10.1111/PBR.12177
10. Swamy BM, Vikram P, Dixit S, Ahmed HU, Kumar A. Meta-analysis of grain yield QTL identified during agricultural drought in grasses showed consensus. *BMC Genomics*. 2011;12. doi:10.1186/1471-2164-12-319
11. Veyrieras JB, Goffinet B, Charcosset A. MetaQTL: A package of new computational methods for the meta-analysis of QTL mapping experiments. *BMC Bioinformatics*. 2007;8. doi:10.1186/1471-2105-8-49
12. Goffinet B, Gerber S. Quantitative trait loci: A meta-analysis. *Genetics*. 2000;155: 463–473. doi:10.1093/GENETICS/155.1.463
13. Wang S, Wong D, Forrest K, Allen A, Chao S, Huang BE, et al. Characterization of polyploid wheat genomic diversity using a high-density 90 000 single nucleotide polymorphism array. *Plant Biotechnol J*. 2014;12: 787–796. doi:10.1111/PBI.12183
14. Griffiths S, Simmonds J, Leverington M, Wang Y, Fish L, et al. Meta-QTL analysis of the genetic control of ear emergence in elite European winter wheat germplasm. *Theor Appl Genet*. 2009;119: 383–395. doi:10.1007/S00122-009-1046-X
15. Liu S, Hall MD, Griffey CA, McKendry AL. Meta-Analysis of QTL Associated with Fusarium Head Blight Resistance in Wheat. *Crop Sci*. 2009;49: 1955–1968. doi:10.2135/CROPSCI2009.03.0115
16. Venske E, dos Santos RS, Farias D da R, Rother V, da Maia LC, Pegoraro C, et al. Meta-

- analysis of the QTLome of fusarium head blight resistance in bread wheat: Refining the current puzzle. *Front Plant Sci.* 2019;10. doi:10.3389/FPLS.2019.00727/FULL
17. Zheng T, Hua C, Li L, Sun Z, Yuan M, Bai G, et al. Integration of meta-QTL discovery with omics: Towards a molecular breeding platform for improving wheat resistance to Fusarium head blight. *Crop J.* 2021;9: 739–749. doi:10.1016/J.CJ.2020.10.006
18. Liu Y, Salsman E, Wang R, Galagedara N, Zhang Q, Fiedler JD, et al. Meta-QTL analysis of tan spot resistance in wheat. *Theor Appl Genet.* 2020;133: 2363–2375. doi:10.1007/S00122-020-03604-1
19. Tyagi S, Gupta PK. Meta-analysis of QTLs Involved in Pre-harvest Sprouting Tolerance and Dormancy in Bread Wheat. *Triticeae Genomics Genet.* 2012. doi:10.5376/TGG.2012.03.0002
20. Acuña-Galindo MA, Mason RE, Subramanian NK, Hays DB. Meta-analysis of wheat QTL regions associated with adaptation to drought and heat stress. *Crop Sci.* 2015;55: 477–492. doi:10.2135/CROPSCI2013.11.0793
21. Kumar A, Saripalli G, Jan I, Kumar K, Sharma PK, Balyan HS, et al. Meta-QTL analysis and identification of candidate genes for drought tolerance in bread wheat (*Triticum aestivum* L.). *Physiol Mol Biol Plants.* 2020;26: 1713. doi:10.1007/S12298-020-00847-6
22. Darzi-Ramandi H, Vahid Shariati J, Tavakol E, Najafi-Zarini H, Bilgrami SS, Razavi K. Detection of consensus genomic regions associated with root architecture of bread wheat on groups 2 and 3 chromosomes using QTL meta-analysis. *Aust J Crop Sci.* 2017;11: 777–785. doi:10.21475/AJCS.17.11.07.PNE312
23. Kumar Saini D, Srivastava P, Pal N, Gupta PK. Meta-QTLs, Ortho-MetaQTLs and Candidate Genes for Grain yield and Associated Traits in Wheat (*Triticum aestivum* L.). 2021 [cited 21 Aug 2021]. doi:10.21203/RS.3.RS-430452/V1
24. Tyagi S, Mir RR, Balyan HS, Gupta PK. Interval mapping and meta-QTL analysis of grain traits in common wheat (*Triticum aestivum* L.). *Euphytica.* 2015;201: 367–380.

doi:10.1007/S10681-014-1217-Y

25. Yang Y, Aduragbemi A, Wei D, Chai Y, Zheng J, Qiao P, et al. Large-Scale Integration of Meta-QTL and Genome-Wide Association Study Discovers the Genomic Regions and Candidate Genes for Yield and Yield-related Traits in Bread Wheat. [cited 21 Aug 2021]. doi:10.21203/rs.3.rs-342038/v1
26. Sorrells ME, Rota M La, Bermudez-Kandianis CE, Greene RA, Kantety R, Munkvold JD, et al. Comparative DNA Sequence Analysis of Wheat and Rice Genomes. *Genome Res.* 2003;13: 1818. doi:10.1101/GR.1113003
27. Kaushik M, Rai S, Venkadesan S, Sinha SK, Mohan S, Mandal PK. Transcriptome Analysis Reveals Important Candidate Genes Related to Nutrient Reservoir, Carbohydrate Metabolism, and Defence Proteins during Grain Development of Hexaploid Bread Wheat and Its Diploid Progenitors. *Genes* 2020, Vol 11, Page 509. 2020;11: 509. doi:10.3390/GENES11050509
28. Welcker C, Sadok W, Dignat G, ... MR-P, 2011 undefined. A common genetic determinism for sensitivities to soil water deficit and evaporative demand: meta-analysis of quantitative trait loci and introgression lines of maize. *academic.oup.com*. [cited 21 Aug 2021]. Available: <https://academic.oup.com/plphys/article-abstract/157/2/718/6108905>
29. Li H-Z, Gao X, Li X-Y, Chen Q-J, Dong J, Zhao W-C. Evaluation of Assembly Strategies Using RNA-Seq Data Associated with Grain Development of Wheat (*Triticum aestivum* L.). *PLoS One.* 2013;8: e83530. doi:10.1371/JOURNAL.PONE.0083530
31. Berman NG, Parker RA. Meta-analysis: Neither quick nor easy. *BMC Med Res Methodol* 2002 21. 2002;2: 1–9. doi:10.1186/1471-2288-2-10
32. Bush WS, Moore JH. Chapter 11: Genome-Wide Association Studies. *PLoS Comput Biol.* 2012;8. doi:10.1371/JOURNAL.PCBI.1002822
33. Godoy J, Gizaw S, Chao S, Blake N, Carter A, Cuthbert R, et al. Genome-wide Association Study of Agronomic Traits in a Spring-Planted North American Elite Hard Red Spring Wheat

- Panel. Crop Sci. 2018;58: 1838–1852. doi:10.2135/CROPSCI2017.07.0423
34. Suliman S, Alemu A, Abdelmula A, Gene GB-P, 2021 undefined. Genome-wide association analysis uncovers stable QTLs for yield and quality traits of spring bread wheat (*Triticum aestivum*) across contrasting environments. Elsevier. [cited 21 Aug 2021]. Available: [https://www.sciencedirect.com/science/article/pii/S2352407320300500?casa\\_token=V3ZKkm sOzhQAAAAA:\\_FhKPChoThhe5NOhFgP2Lf\\_0IWNNFpx3qHGhaHYSqPmlAOlowS4n0F7 wk1J66cT3194aOPbW5Q](https://www.sciencedirect.com/science/article/pii/S2352407320300500?casa_token=V3ZKkm sOzhQAAAAA:_FhKPChoThhe5NOhFgP2Lf_0IWNNFpx3qHGhaHYSqPmlAOlowS4n0F7 wk1J66cT3194aOPbW5Q)
35. Aduragbemi A, Soriano JM. Unravelling consensus genomic regions conferring leaf rust resistance in wheat via meta-QTL analysis. bioRxiv. 2021; 2021.05.11.443557. doi:10.1101/2021.05.11.443557
36. Dunwell JM, Gane PJ. Microbial relatives of seed storage proteins: Conservation of motifs in a functionally diverse superfamily of enzymes. J Mol Evol. 1998;46: 147–154. doi:10.1007/PL00006289
37. Zhang F, Wen Y, Guo X. CRISPR/Cas9 for genome editing: progress, implications and challenges. Hum Mol Genet. 2014;23: R40–R46. doi:10.1093/HMG/DDU125
38. Ali AS, Elozeiri AA. Metabolic Processes During Seed Germination. Adv Seed Biol. 2017 [cited 30 Oct 2021]. doi:10.5772/INTECHOPEN.70653
39. Khahani B, Tavakol E, Shariati V, Fornara F. Genome wide screening and comparative genome analysis for Meta-QTLs, ortho-MQTLs and candidate genes controlling yield and yield-related traits in rice. BMC Genomics. 2020;21. doi:10.1186/S12864-020-6702-1
40. Mathew IE, Das S, Mahto A, Agarwal P. Three Rice NAC Transcription Factors Heteromerize and Are Associated with Seed Size. Front Plant Sci. 2016;0: 1638. doi:10.3389/FPLS.2016.01638
41. Gijzen M, Miller SS, Kuflu K, Buzzell RI, Miki BLA. Hydrophobic Protein Synthesized in the Pod Endocarp Adheres to the Seed Surface. Plant Physiol. 1999;120: 951.

doi:10.1104/PP.120.4.951

42. Basu U, Upadhyaya HD, Srivastava R, Daware A, Malik N, Sharma A, et al. ABC Transporter-Mediated Transport of Glutathione Conjugates Enhances Seed Yield and Quality in Chickpea. *Plant Physiol.* 2019;180: 253–275. doi:10.1104/PP.18.00934
43. McDonald TR, Ward JM. Evolution of Electrogenic Ammonium Transporters (AMTs). *Front Plant Sci.* 2016;0: 352. doi:10.3389/FPLS.2016.00352
44. Holmquist M. Alpha/Beta-hydrolase fold enzymes: structures, functions and mechanisms. *Curr Protein Pept Sci.* 2000;1: 209–235. doi:10.2174/1389203003381405
45. Distelfeld A, Avni R, Fischer AM. Senescence, nutrient remobilization, and yield in wheat and barley. *J Exp Bot.* 2014;65: 3783–3798. doi:10.1093/JXB/ERT477
46. Anjum FM, Khan MR, Din A, Saeed M, Pasha I, Arshad MU. Wheat Gluten: High Molecular Weight Glutenin Subunits—Structure, Genetics, and Relation to Dough Elasticity. *J Food Sci.* 2007;72: R56–R63. doi:10.1111/J.1750-3841.2007.00292.X
47. Horstmann SW, Lynch KM, Arendt EK. Starch Characteristics Linked to Gluten-Free Products. *Foods* 2017, Vol 6, Page 29. 2017;6: 29. doi:10.3390/FOODS6040029
48. Hanif M, Gao F, Liu J, Wen W, Zhang Y, Rasheed A, et al. TaTGW6-A1, an ortholog of rice TGW6, is associated with grain weight and yield in bread wheat. *Mol Breed.* 2016;36: 1–8. doi:10.1007/S11032-015-0425-Z
49. Yang J, Luo D, Yang B, Frommer WB, Eom J-S. SWEET11 and 15 as key players in seed filling in rice. *New Phytol.* 2018;218: 604–615. doi:10.1111/NPH.15004
50. Avni R, Oren L, Shabtay G, Assili S, Pozniak C, Hale I, et al. Genome Based Meta-QTL Analysis of Grain Weight in Tetraploid Wheat Identifies Rare Alleles of GRF4 Associated with Larger Grains. *Genes (Basel).* 2018;9. doi:10.3390/GENES9120636
51. Endelman JB, Plomion C. LPmerge: An R package for merging genetic maps by linear



749 programming. Bioinformatics. 2014;30: 1623–1624.  
750 doi:10.1093/BIOINFORMATICS/BTU091

751 52. Somers DJ, Isaac P, Edwards K. A high-density microsatellite consensus map for bread wheat  
752 (*Triticum aestivum* L.). Theor Appl Genet 2004 1096. 2004;109: 1105–1114.  
753 doi:10.1007/S00122-004-1740-7

754 53. Marone D, Russo MA, Laidò G, Vita P De, Papa R, Blanco A, et al. Genetic basis of  
755 qualitative and quantitative resistance to powdery mildew in wheat: from consensus regions to  
756 candidate genes. BMC Genomics. 2013;14: 562. doi:10.1186/1471-2164-14-562

757 54. Cavanagh CR, Chao S, Wang S, Huang BE, Stephen S, Kiani S, et al. Genome-wide  
758 comparative diversity uncovers multiple targets of selection for improvement in hexaploid  
759 wheat landraces and cultivars. Proc Natl Acad Sci U S A. 2013;110: 8057–8062.  
760 doi:10.1073/PNAS.1217133110

761 55. Winfield MO, Allen AM, Burridge AJ, Barker GLA, Benbow HR, Wilkinson PA, et al. High-  
762 density SNP genotyping array for hexaploid wheat and its secondary and tertiary gene pool.  
763 Plant Biotechnol J. 2016;14: 1195–1206. doi:10.1111/PBI.12485

764 56. Cui F, Zhang N, Fan XL, Zhang W, Zhao CH, Yang LJ, et al. Utilization of a Wheat660K  
765 SNP array-derived high-density genetic map for high-resolution mapping of a major QTL for  
766 kernel number. Sci Rep. 2017;7. doi:10.1038/S41598-017-04028-6

767 57. Darvasi A, Soller M. A simple method to calculate resolving power and confidence interval of  
768 QTL map location. Behav Genet. 1997;27: 125–132. doi:10.1023/A:1025685324830

769 58. Sosnowski O, Charcosset A, Joets J. Biomercator V3: An upgrade of genetic map compilation  
770 and quantitative trait loci meta-analysis algorithms. Bioinformatics. 2012;28: 2082–2083.  
771 doi:10.1093/BIOINFORMATICS/BTS313

772 59. Youlin P, Xia Z, Ting Z, Fan W, Shiwen T, Lamei L, et al. Meta-Analysis of Qtl Associated  
773 With Starch Pasting Viscosity in Rice (*Oryza Sativa* L.). Bangladesh J Bot. 2021;50: 269–276.

doi:10.3329/BJB.V50I2.54082

60. Borrill P, Ramirez-Gonzalez R, Uauy C. expVIP: a Customizable RNA-seq Data Analysis and Visualization Platform. *Plant Physiol.* 2016;170: 2172–2186. doi:10.1104/PP.15.01667
61. Gillies SA, Futardo A, Henry RJ. Gene expression in the developing aleurone and starchy endosperm of wheat. *Plant Biotechnol J.* 2012;10: 668–679. doi:10.1111/J.1467-7652.2012.00705.X
62. Pfeifer M, Kugler KG, Sandve SR, Zhan B, Rudi H, Hvidsten TR, et al. Genome interplay in the grain transcriptome of hexaploid bread wheat. *Science* (80- ). 2014;345. doi:10.1126/SCIENCE.1250091
63. Pearce S, Huttly AK, Prosser IM, Li Y, Vaughan SP, Gallova B, et al. Heterologous expression and transcript analysis of gibberellin biosynthetic genes of grasses reveals novel functionality in the GA3ox family. *BMC Plant Biol* 2015 151. 2015;15: 1–19. doi:10.1186/S12870-015-0520-7
64. Barrero JM, Cavanagh C, Verbyla KL, Tibbits JFG, Verbyla AP, Huang BE, et al. Transcriptomic analysis of wheat near-isogenic lines identifies PM19-A1 and A2 as candidates for a major dormancy QTL. *Genome Biol* 2015 161. 2015;16: 1–18. doi:10.1186/S13059-015-0665-6
65. Wagner GP, Kin K, Lynch VJ. A model based criterion for gene expression calls using RNA-seq data. *Theory Biosci.* 2013;132: 159–164. doi:10.1007/S12064-013-0178-3

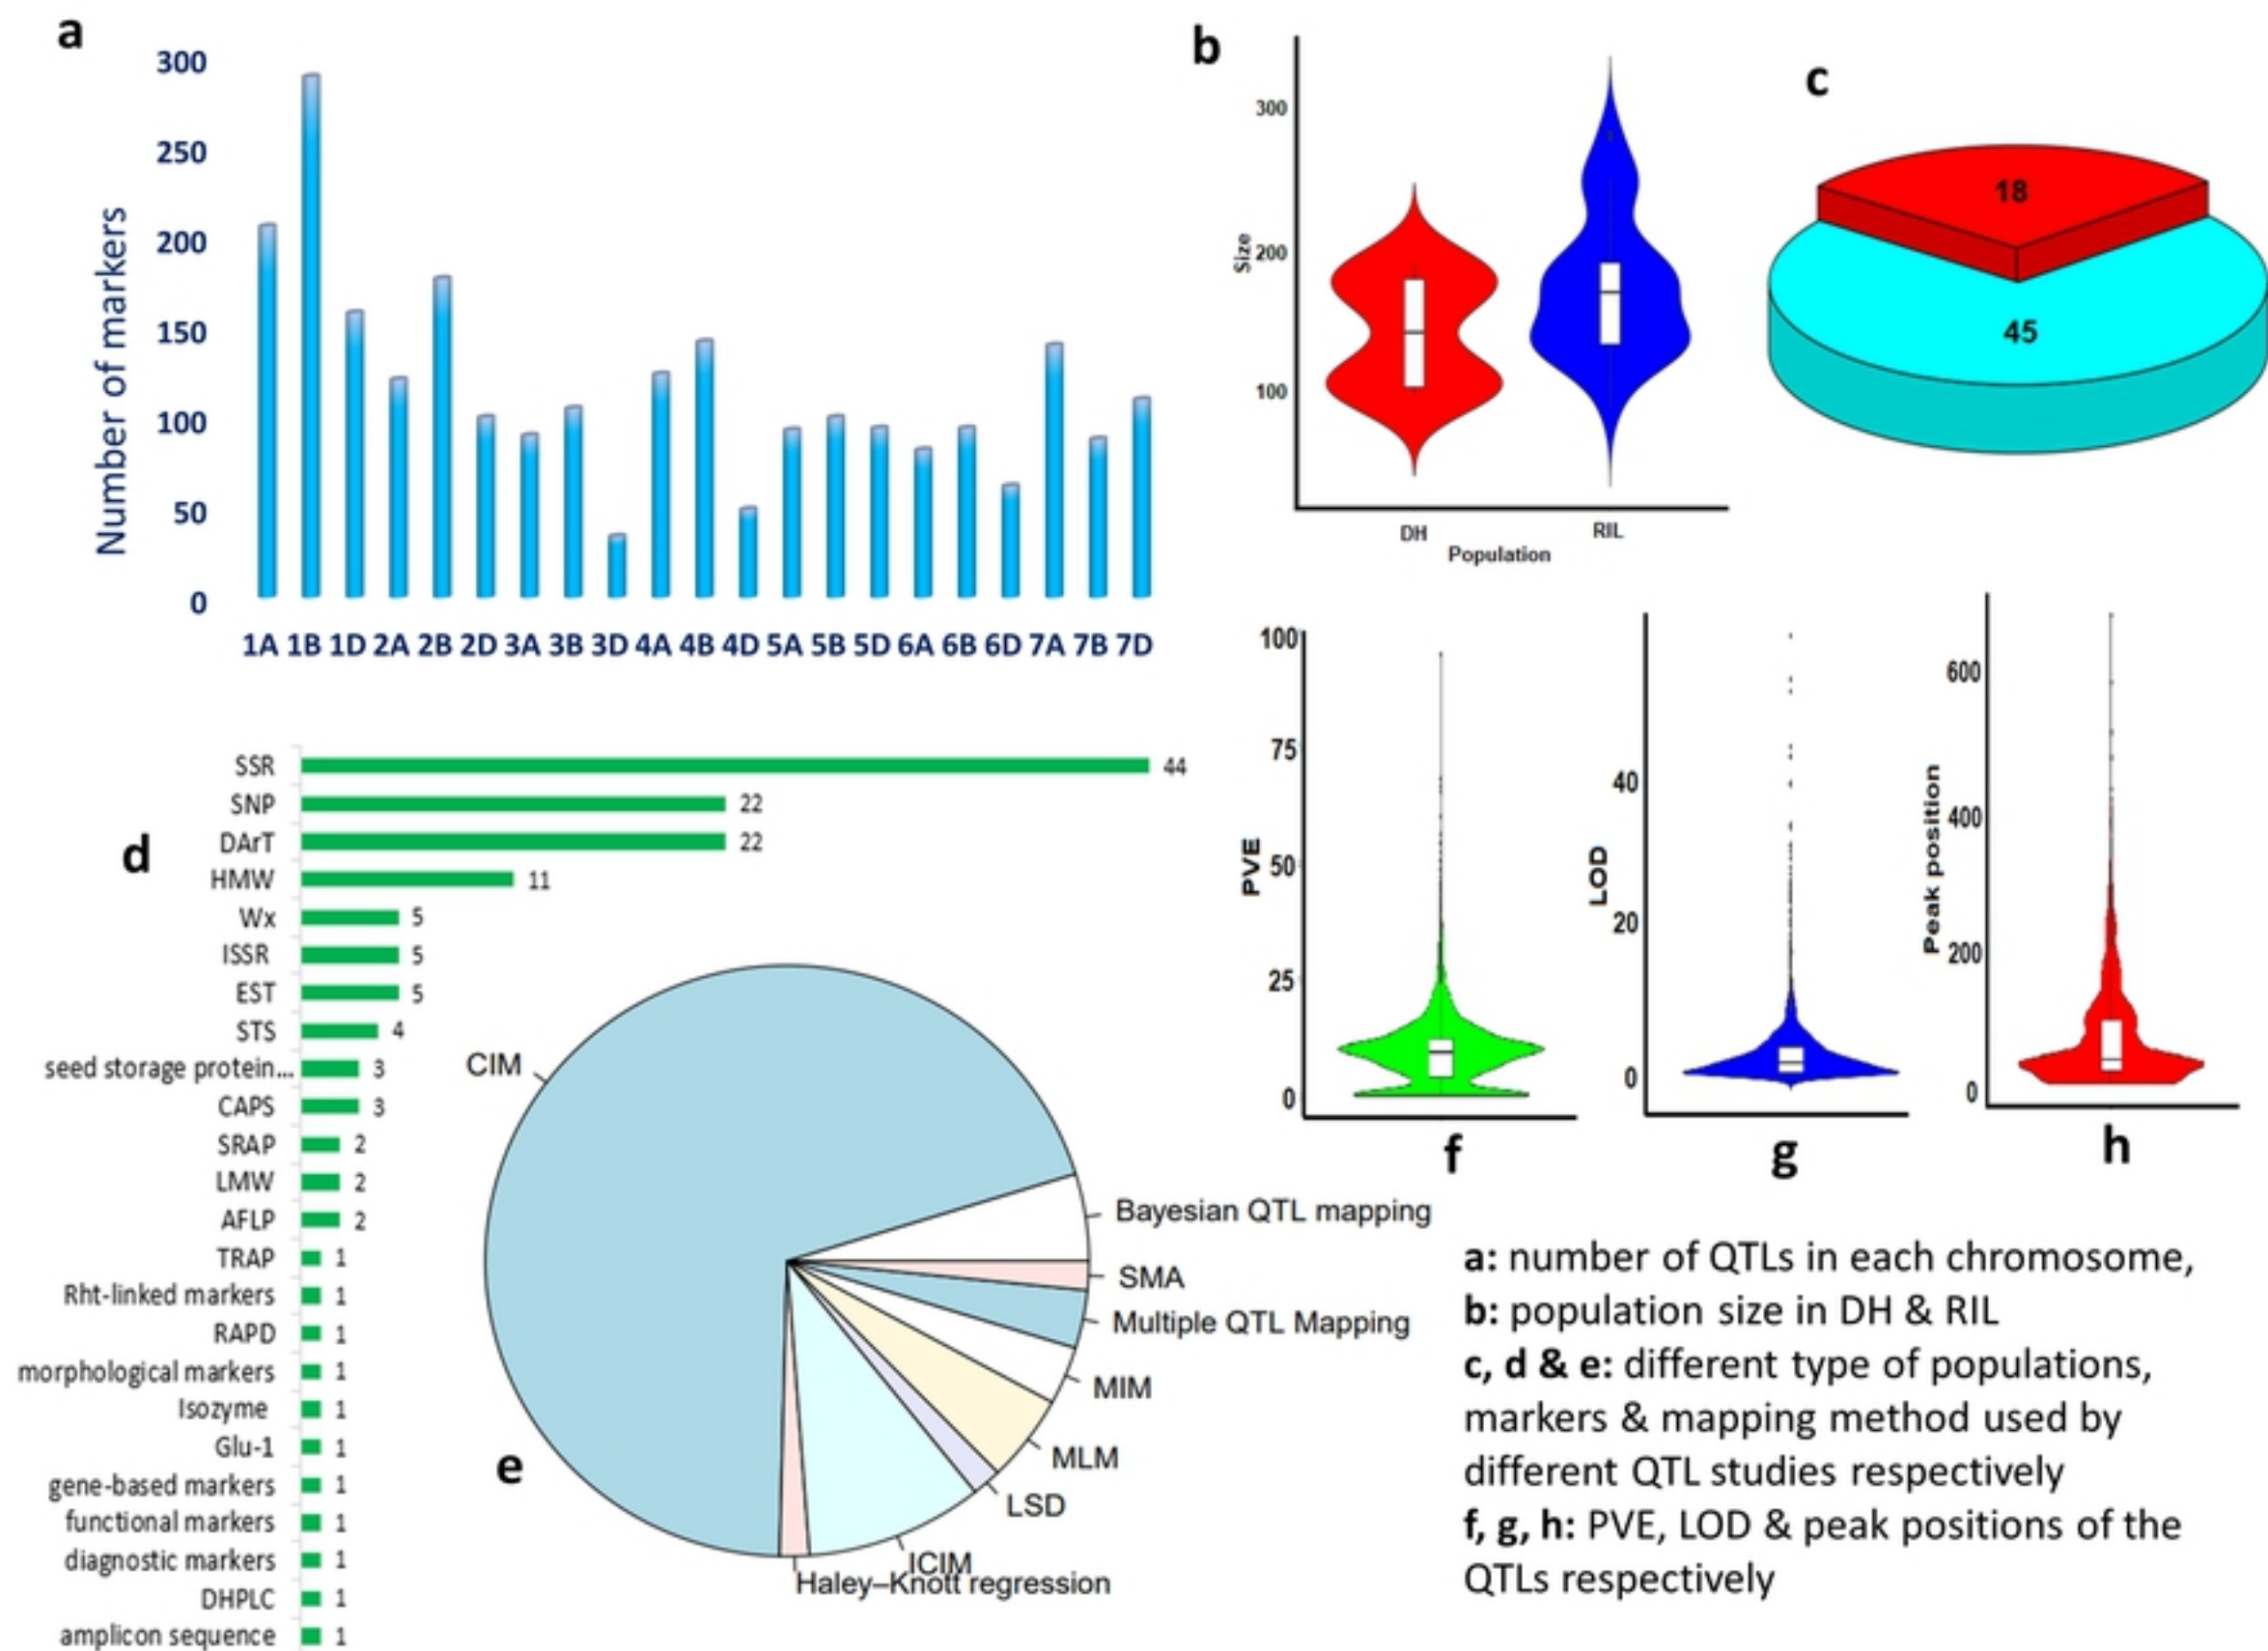

Fig 1. Salient features of the initial QTLs

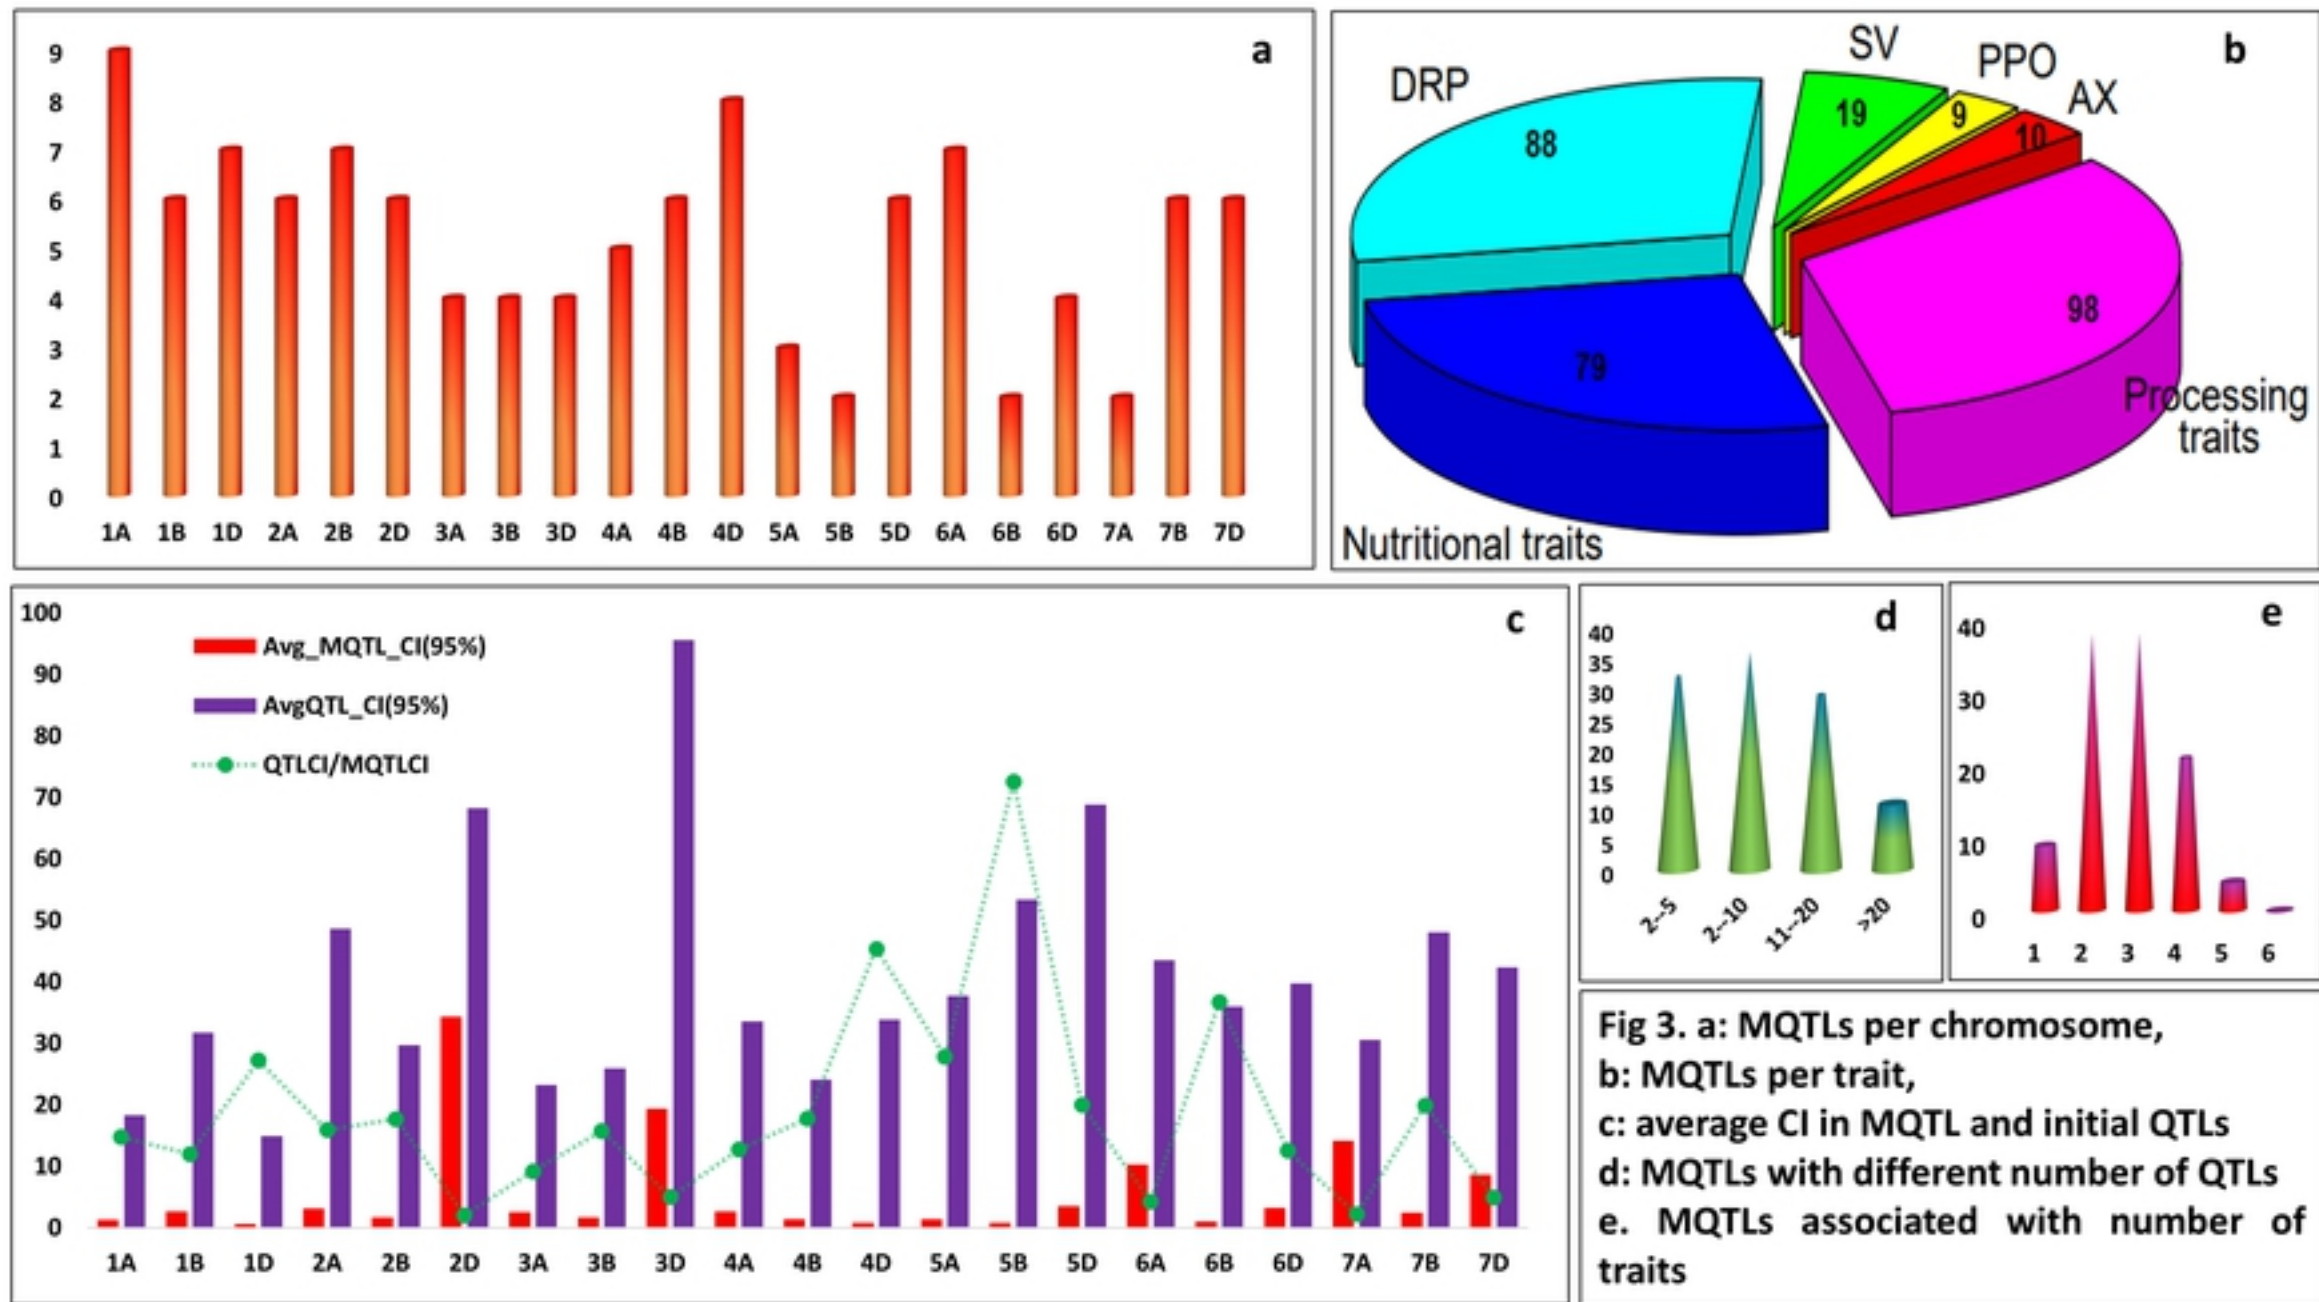

Fig 3. Characteristic features of the MQTLs



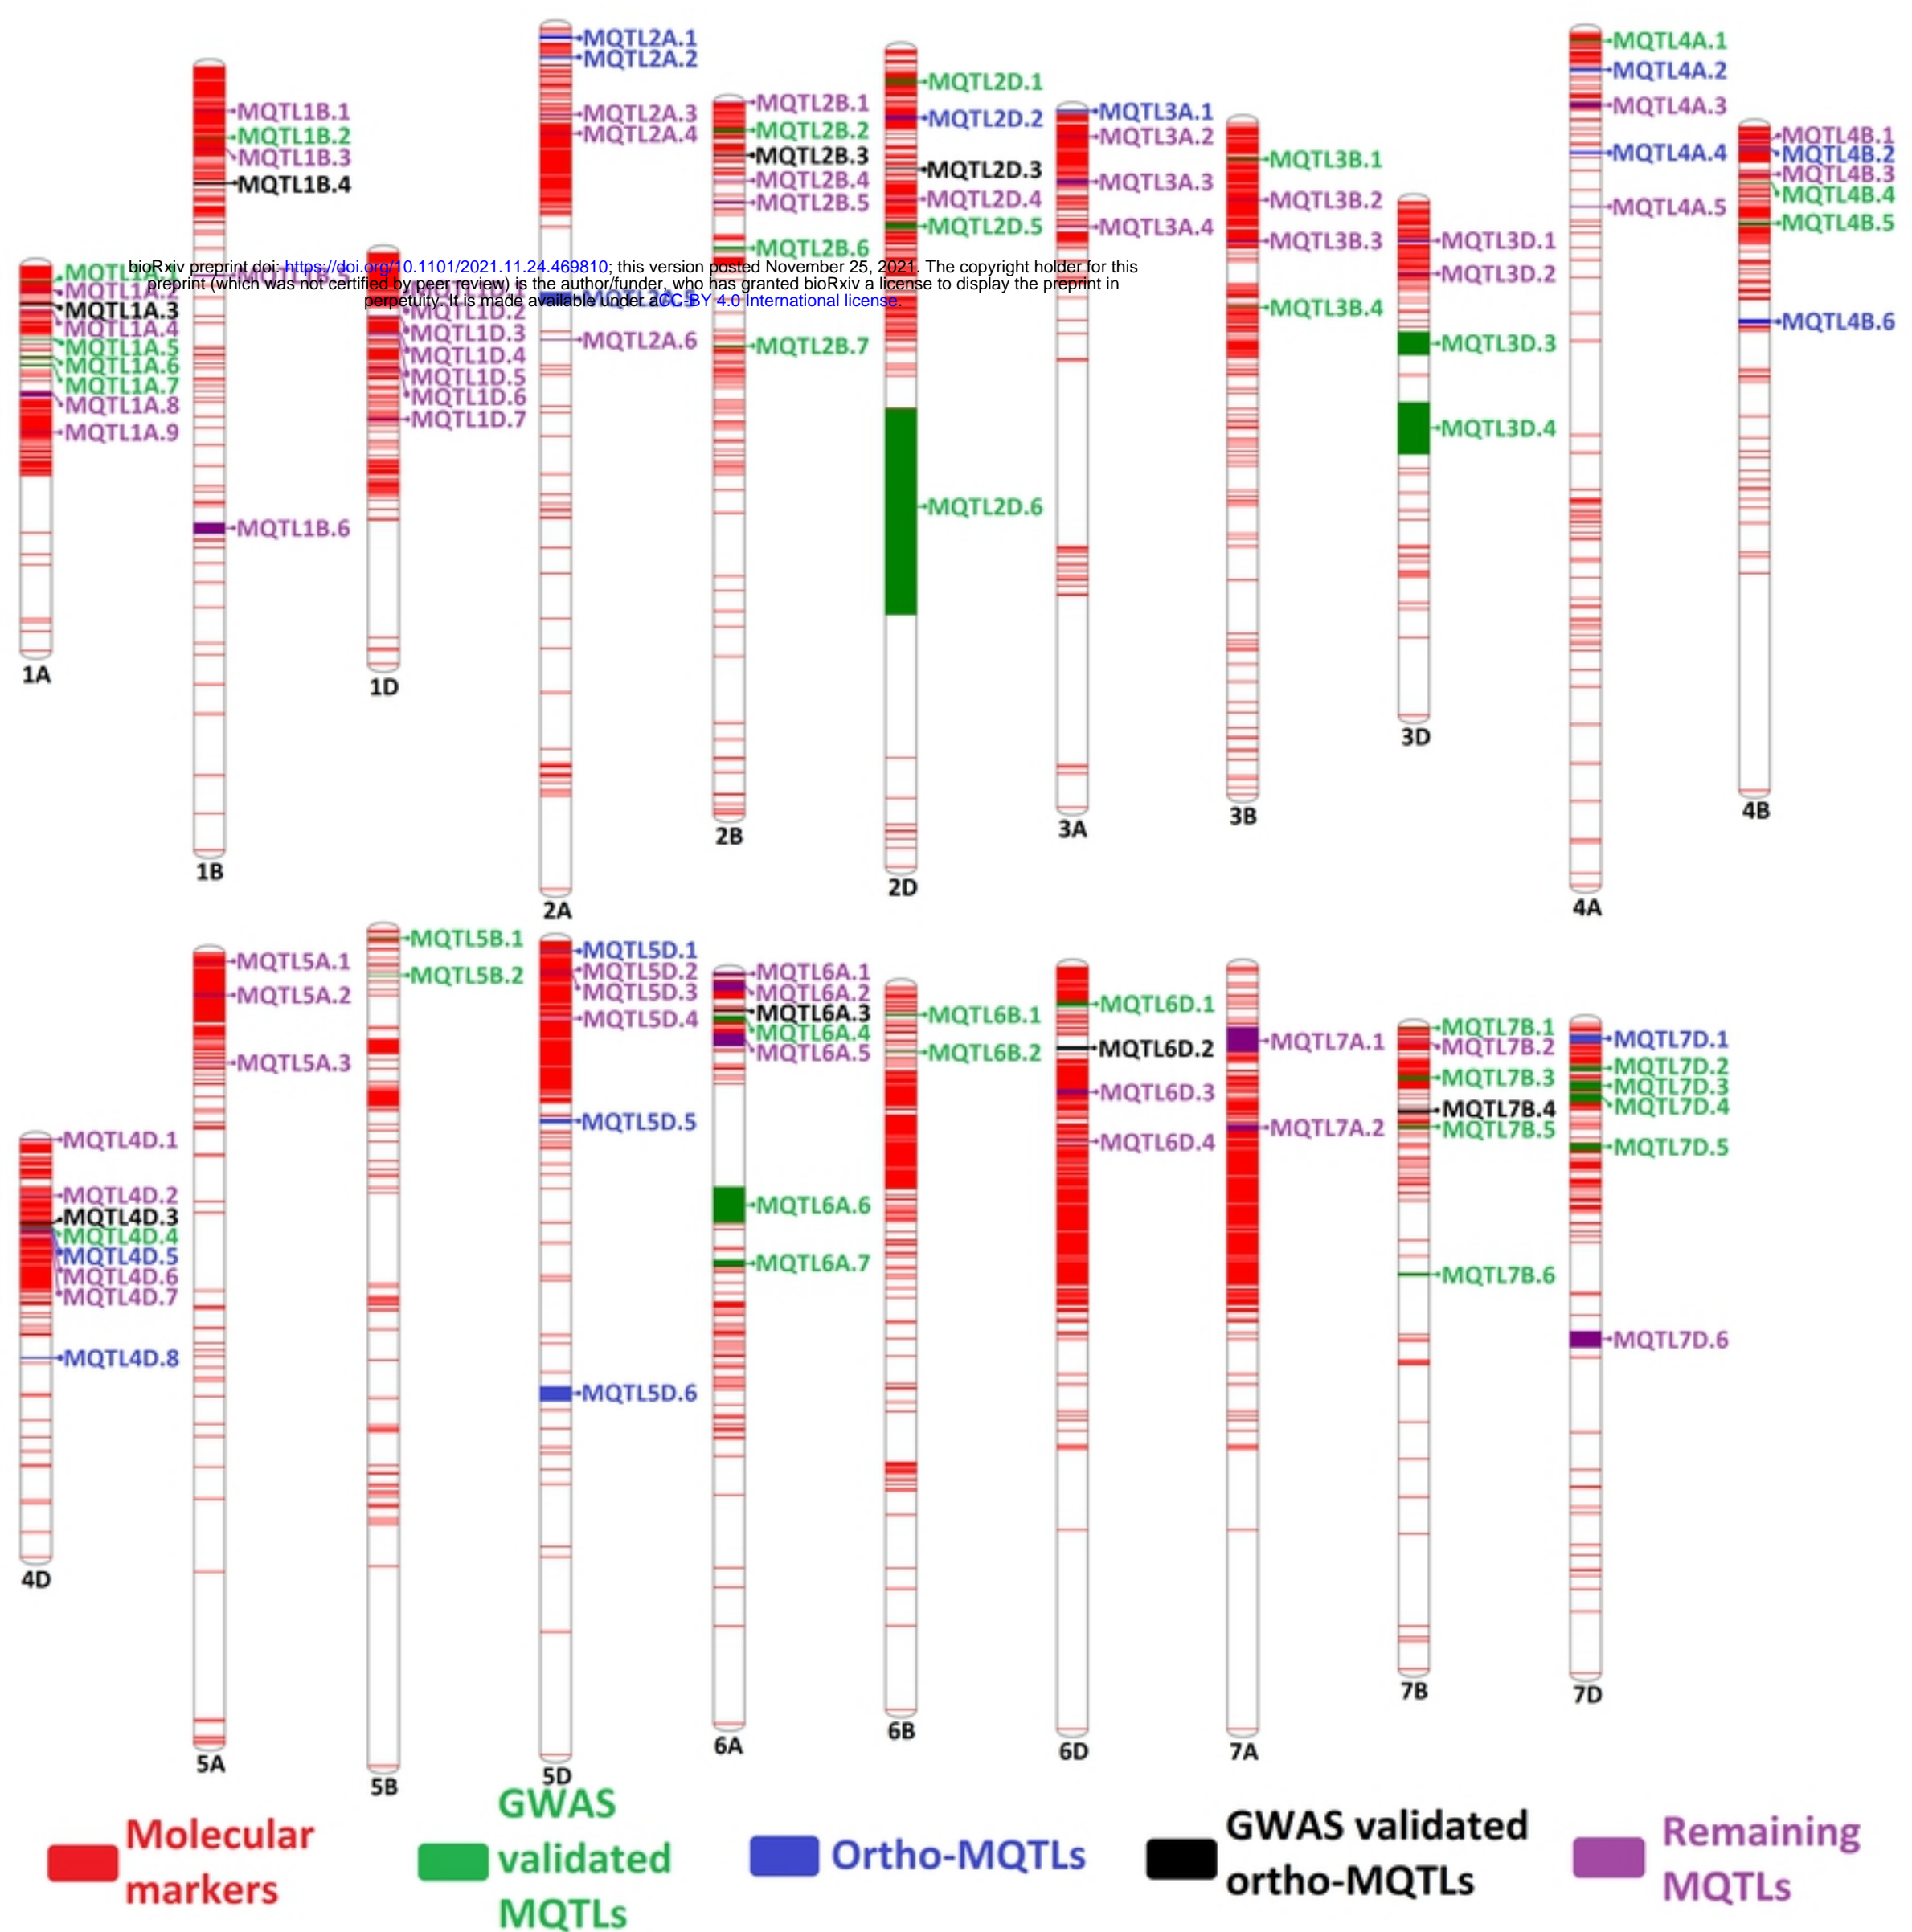

Fig 4. Distribution of different MQTLs on wheat chromosomes. E



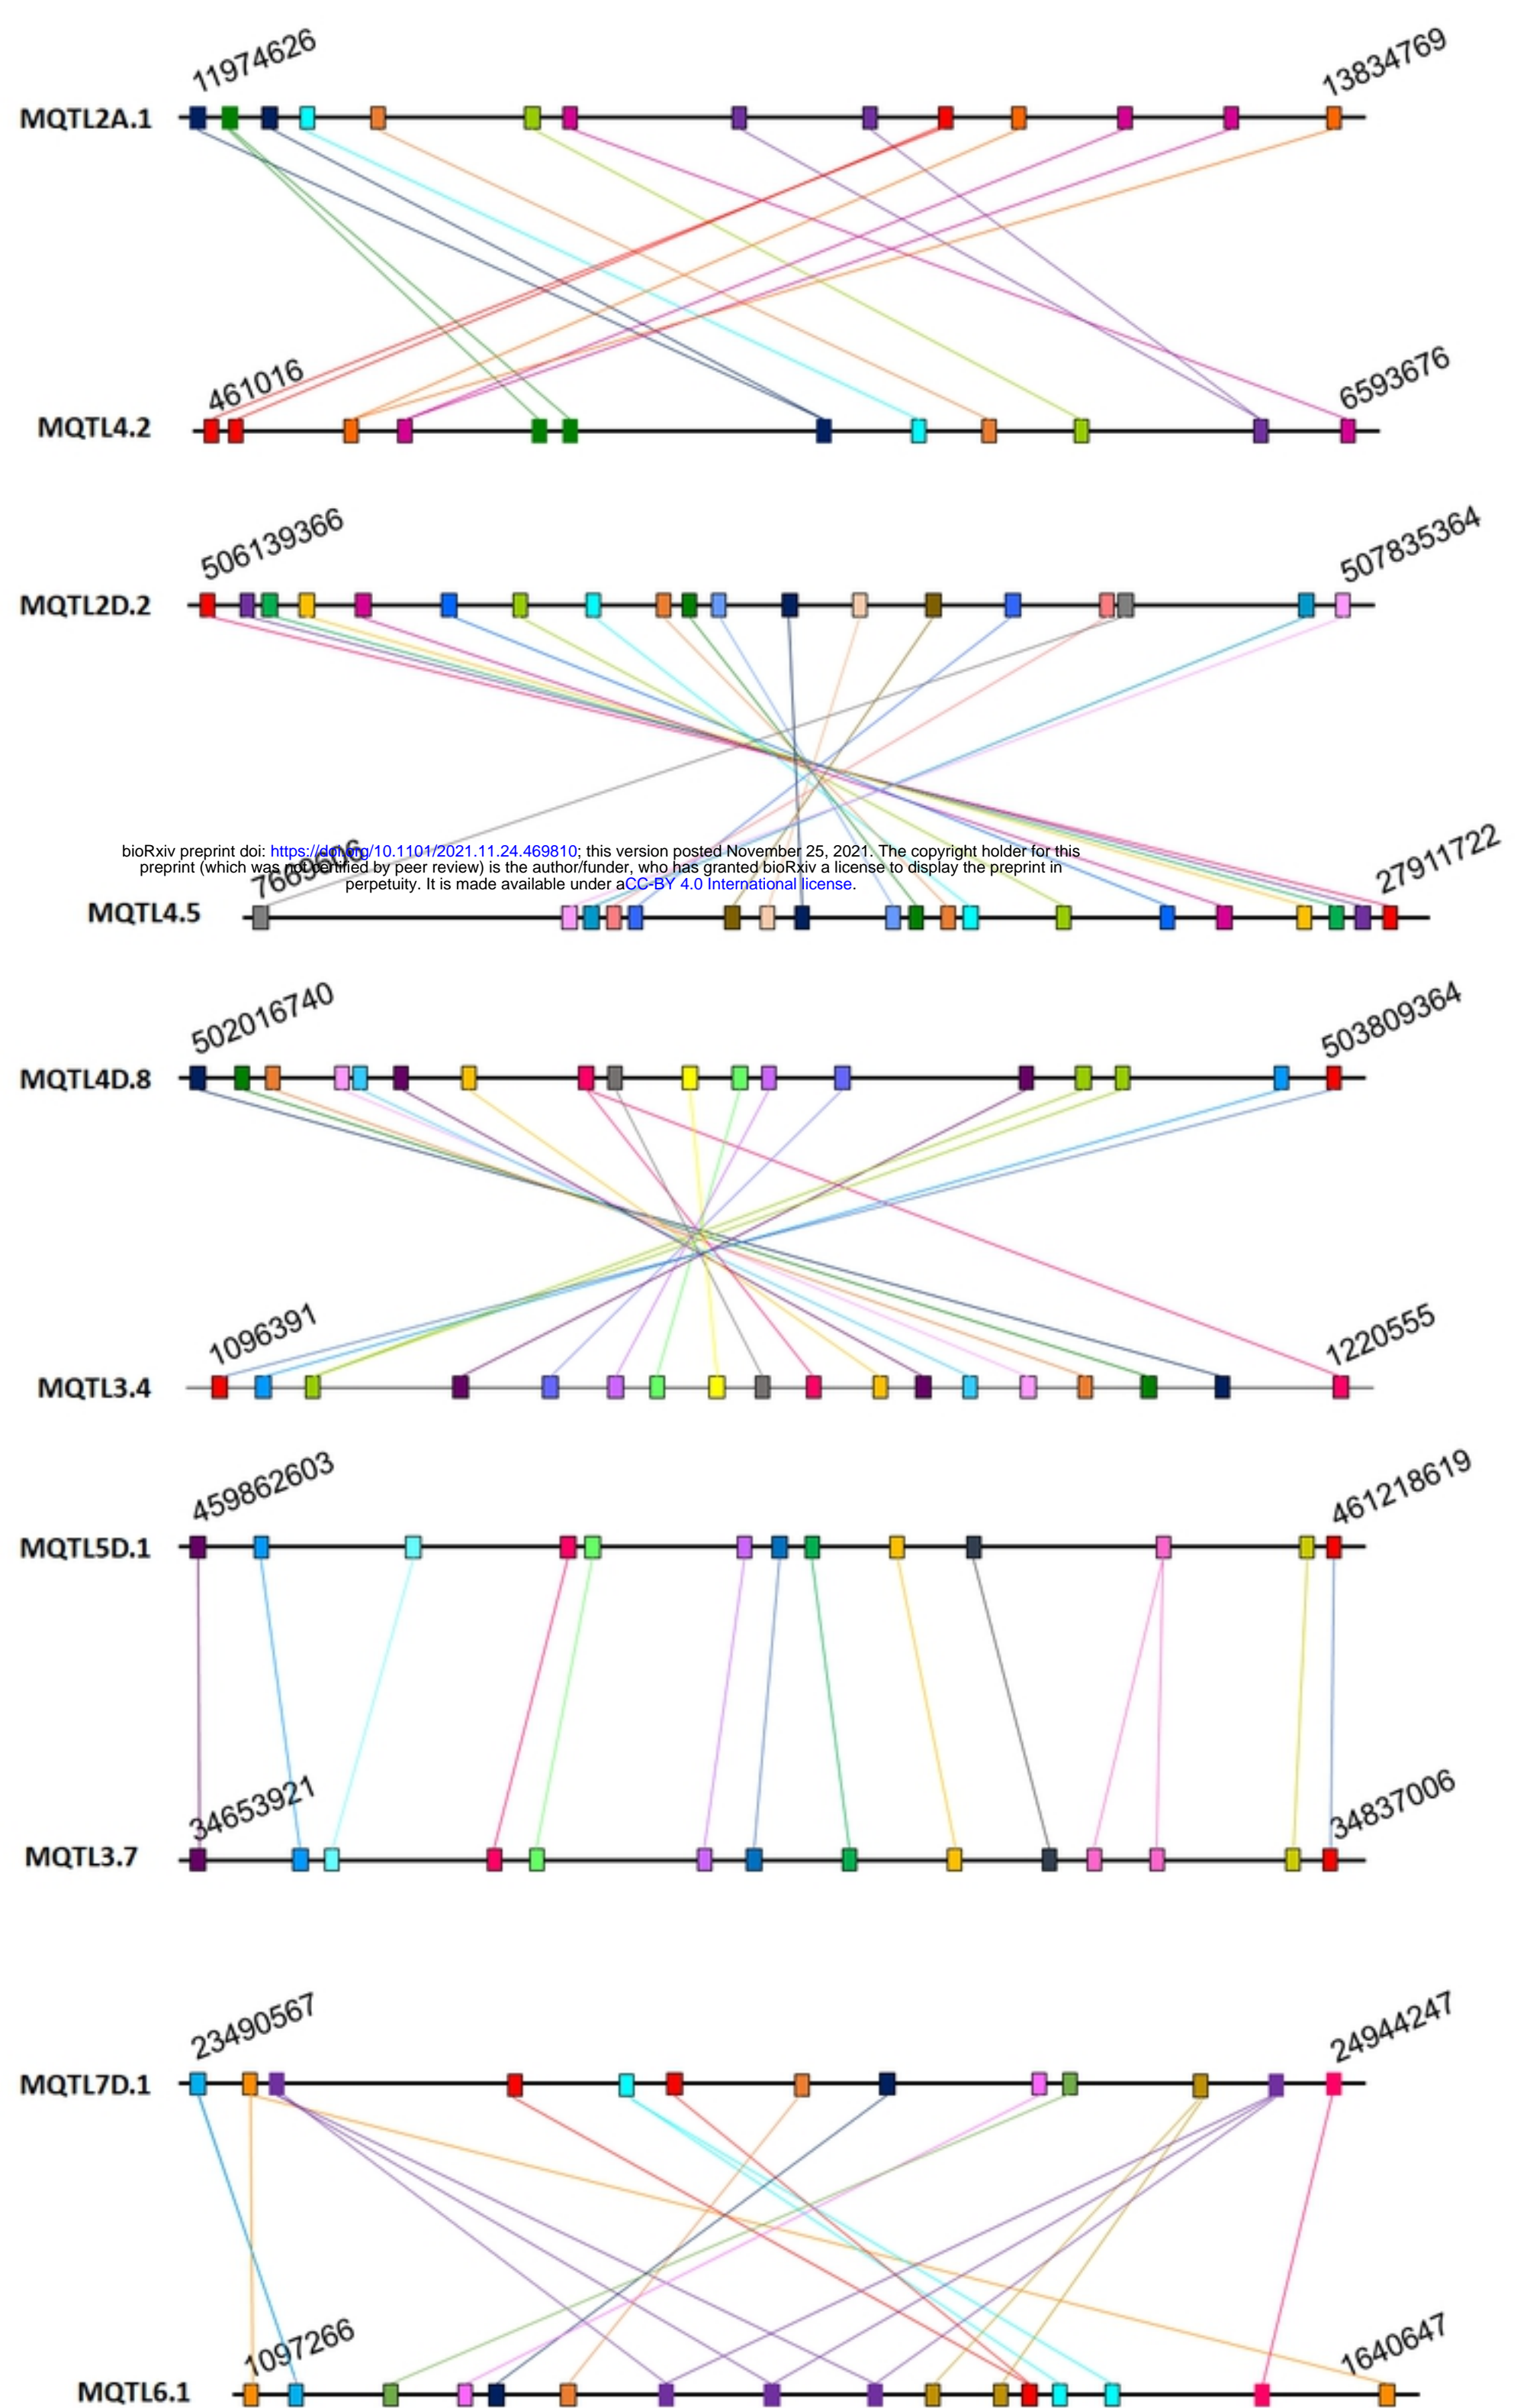

Fig 5: The syntenic region of MQTLs between the wheat

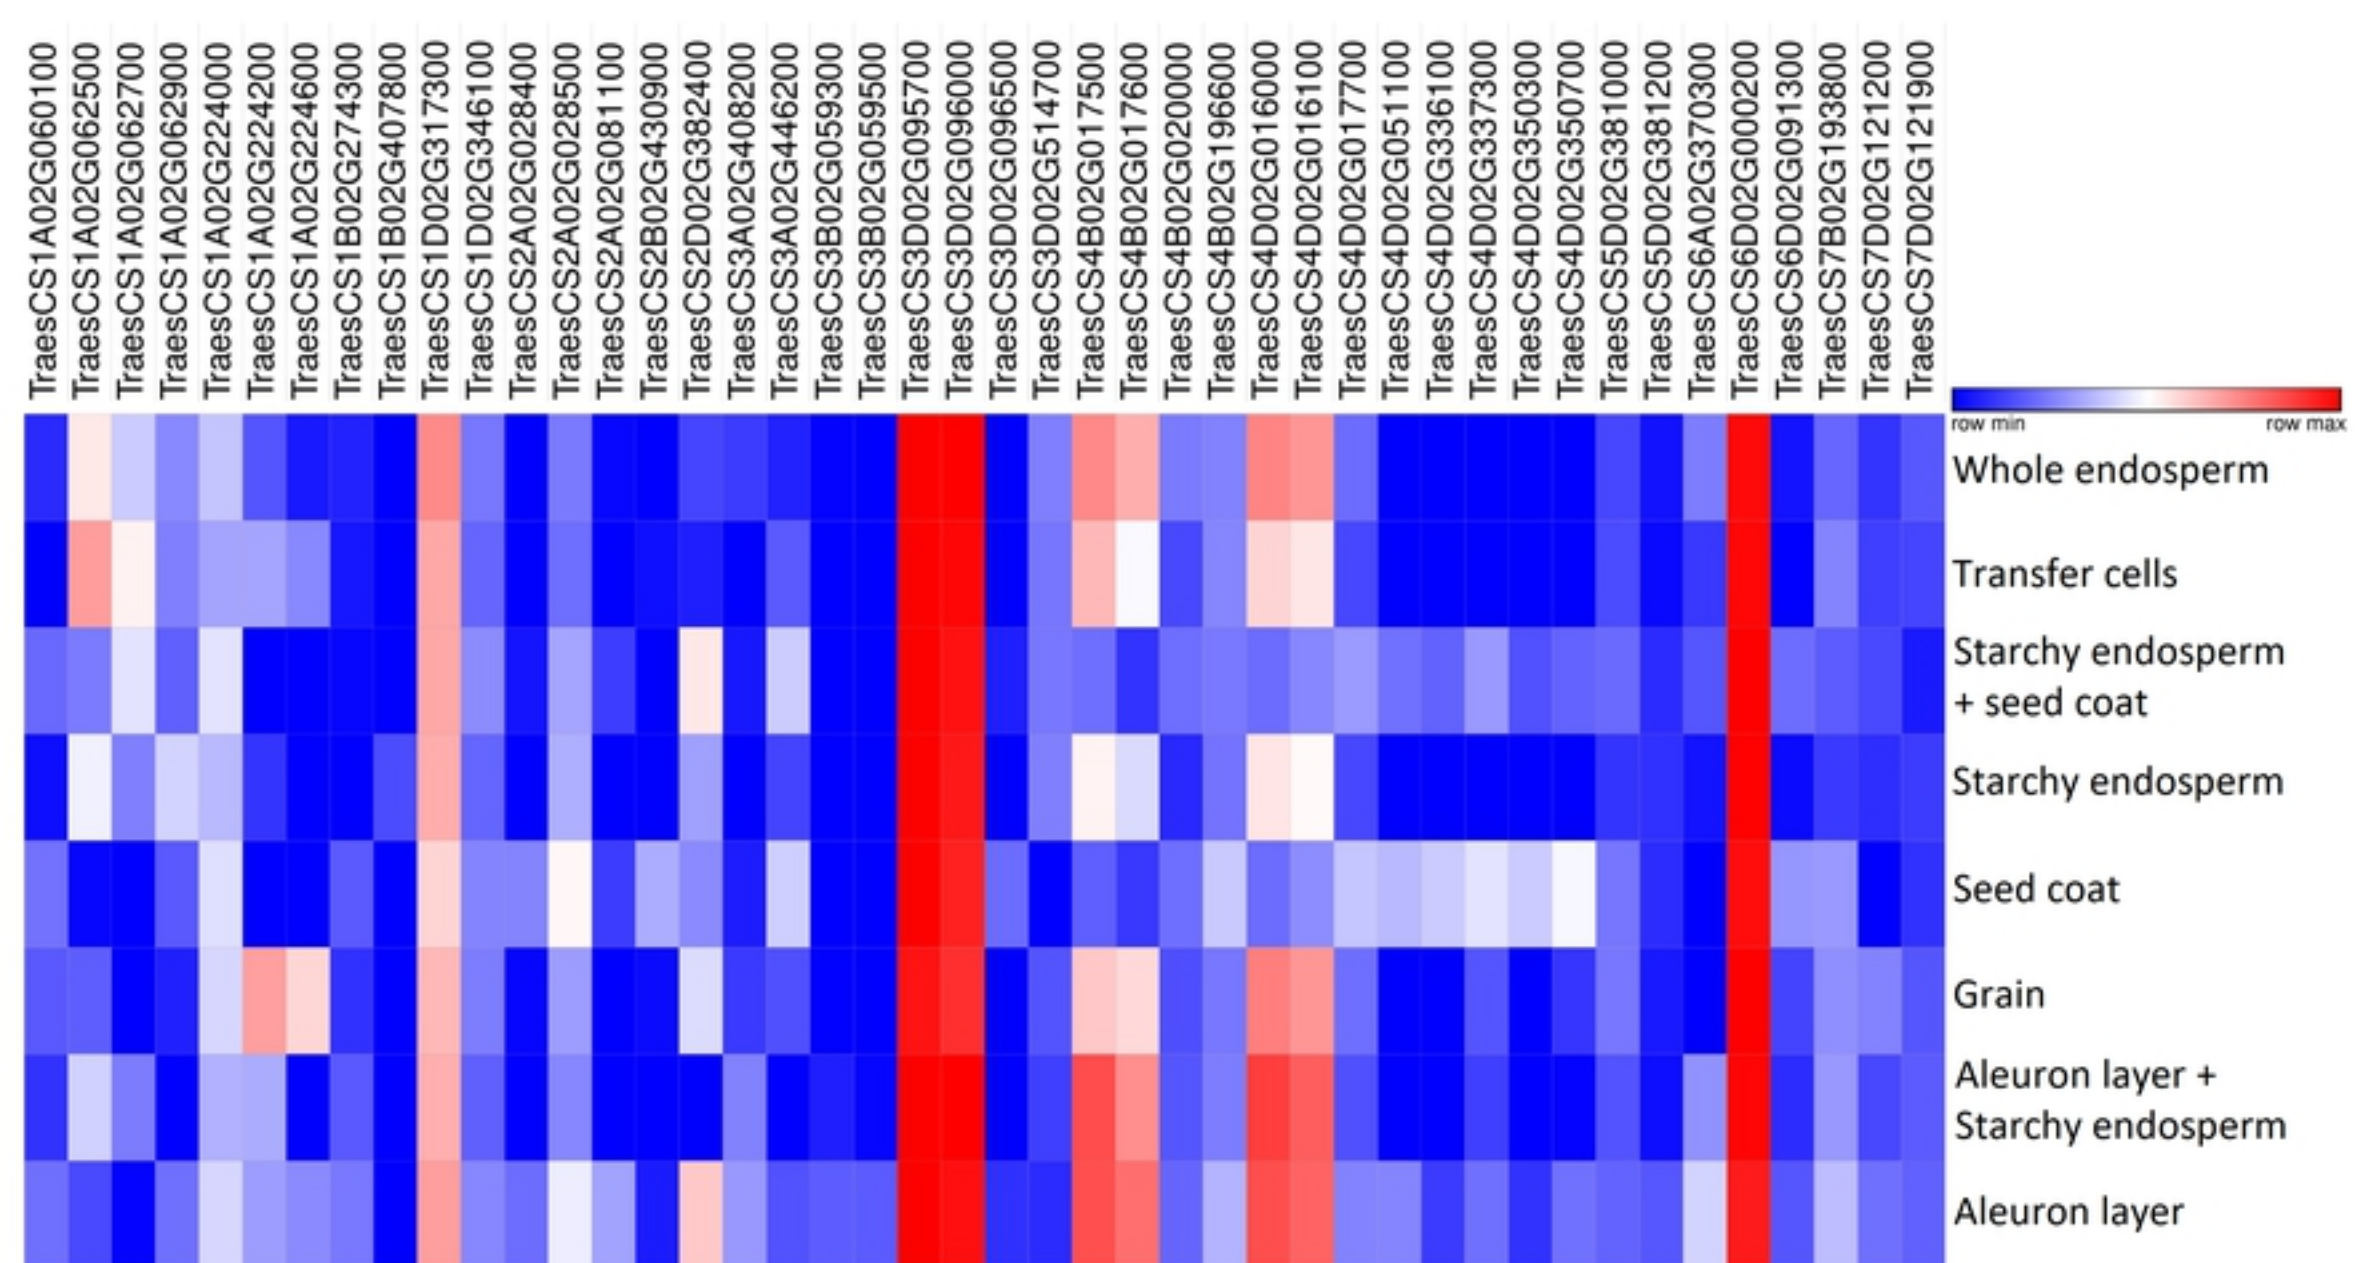

Fig 7. Expression pattern of 44 high-confidence candidate genes



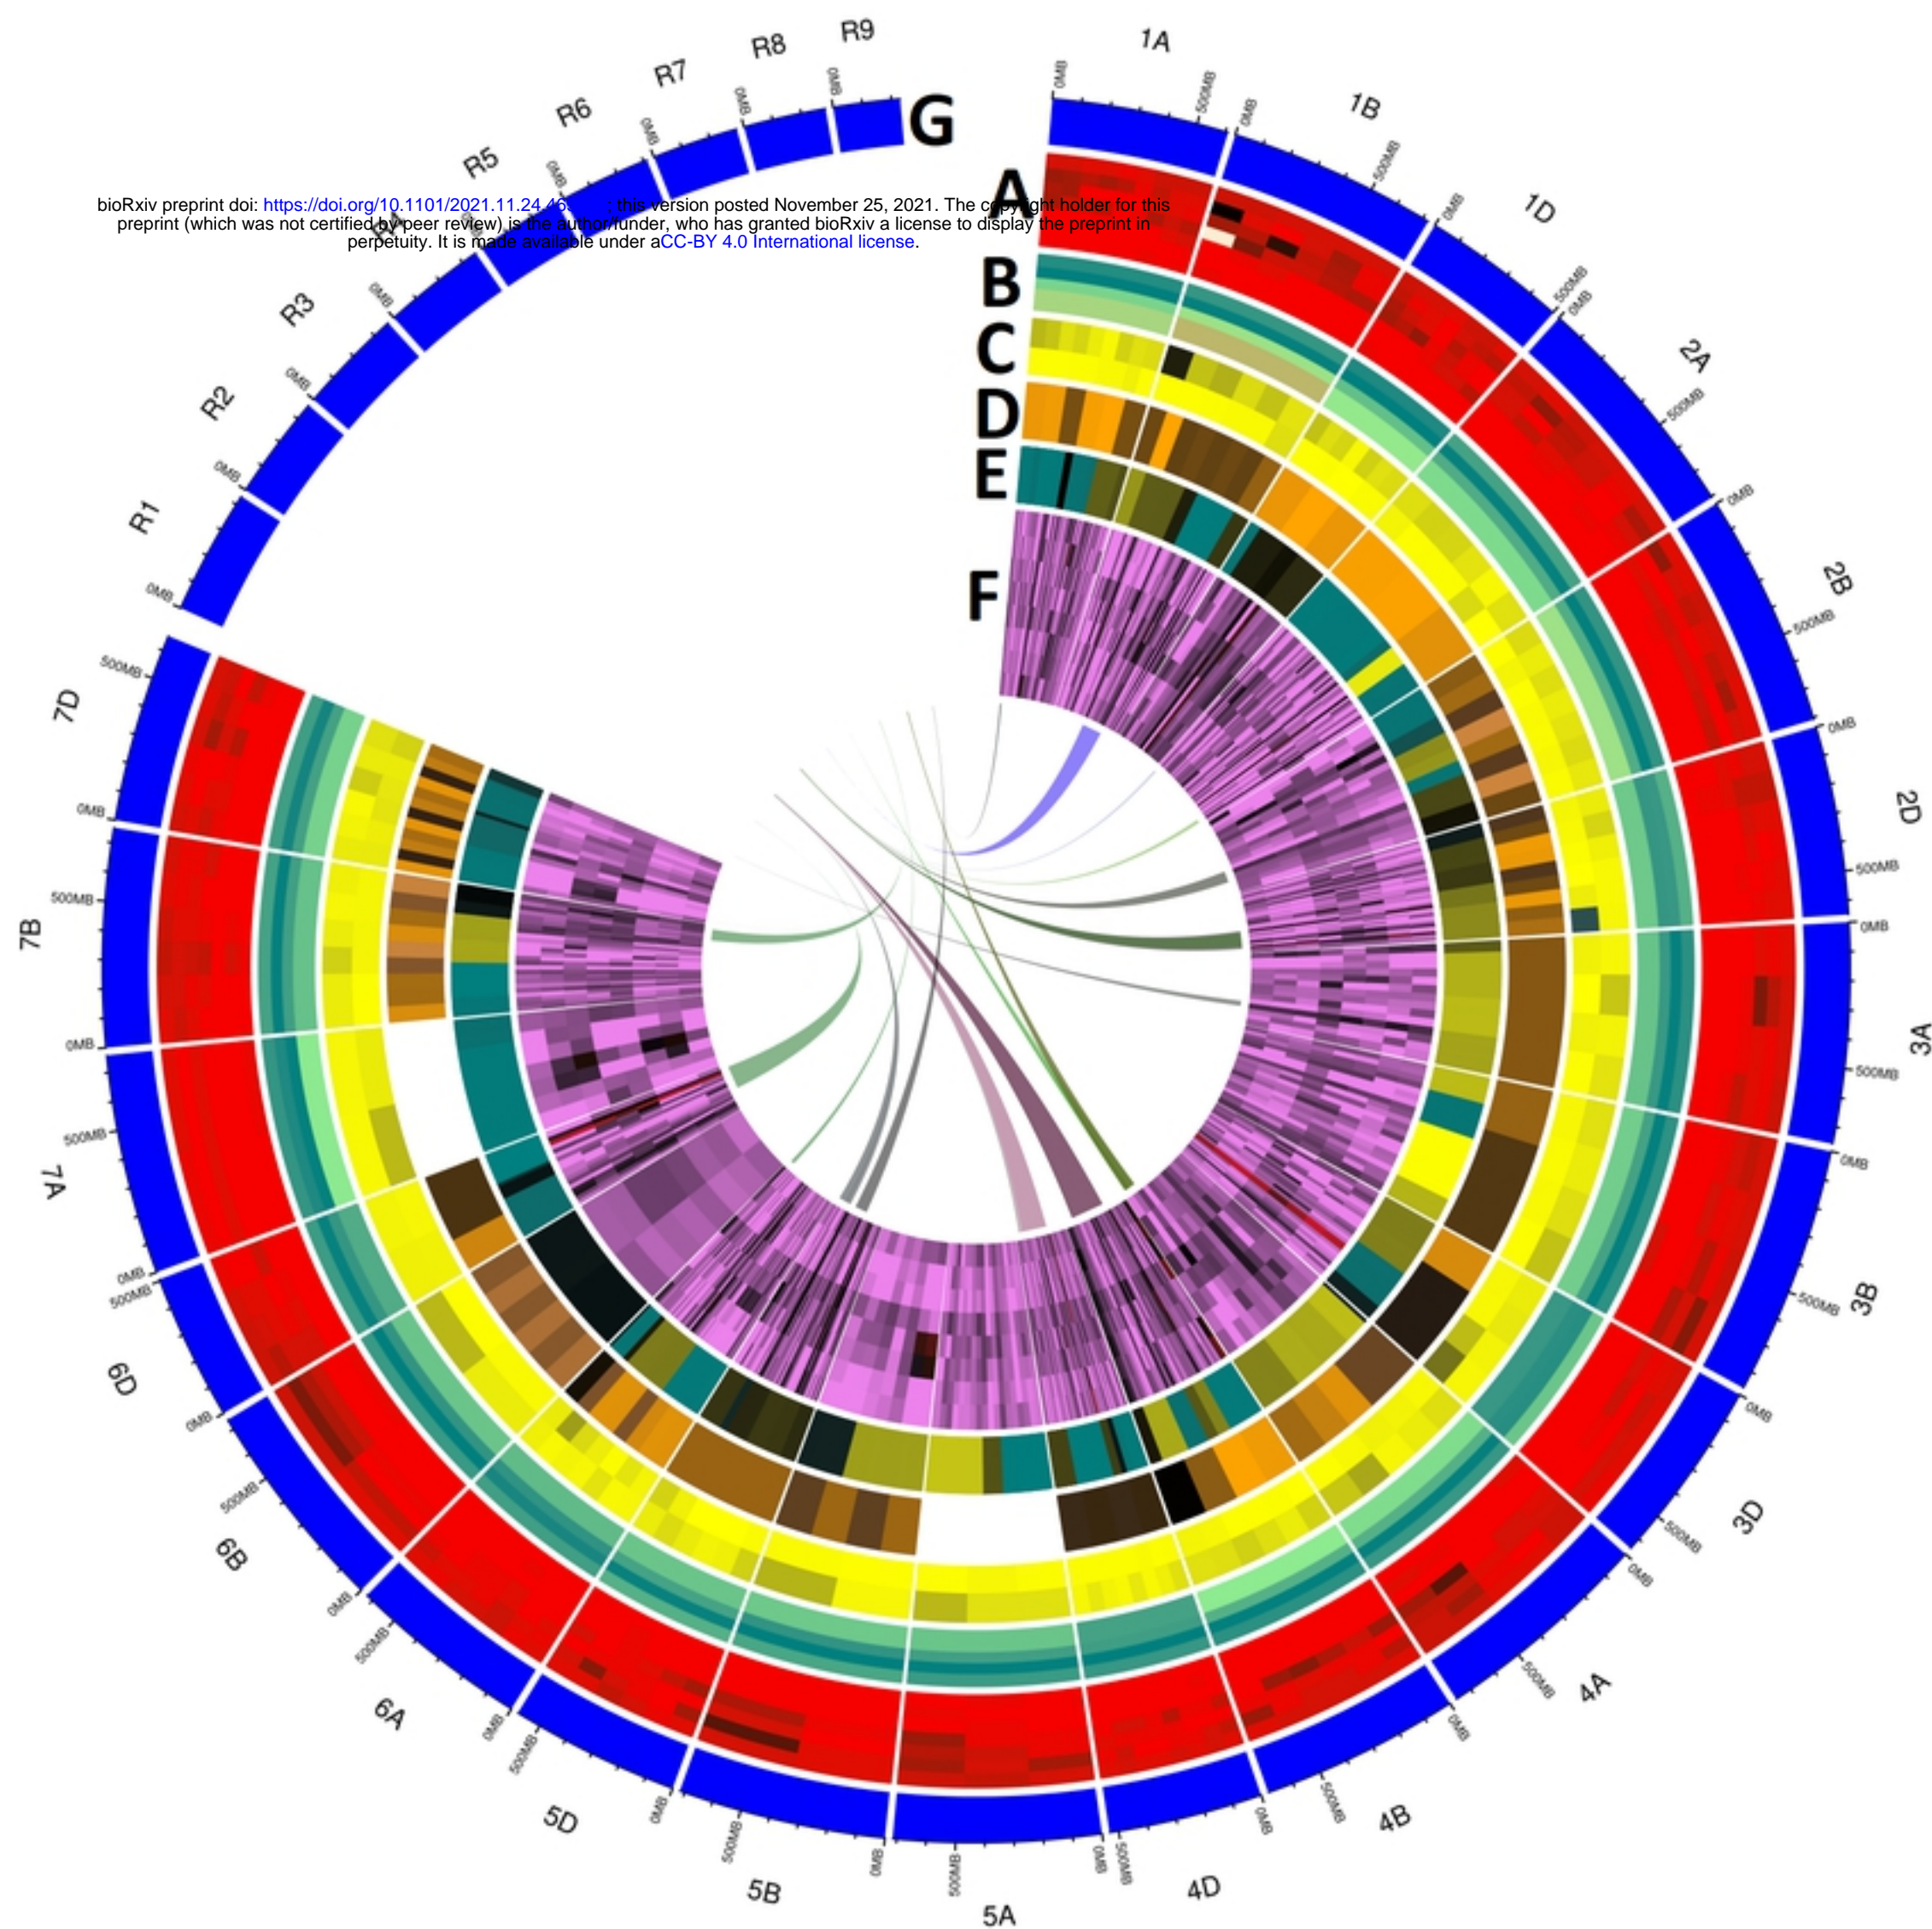

Fig 8. Circular diagram showing the different features of QTLs and



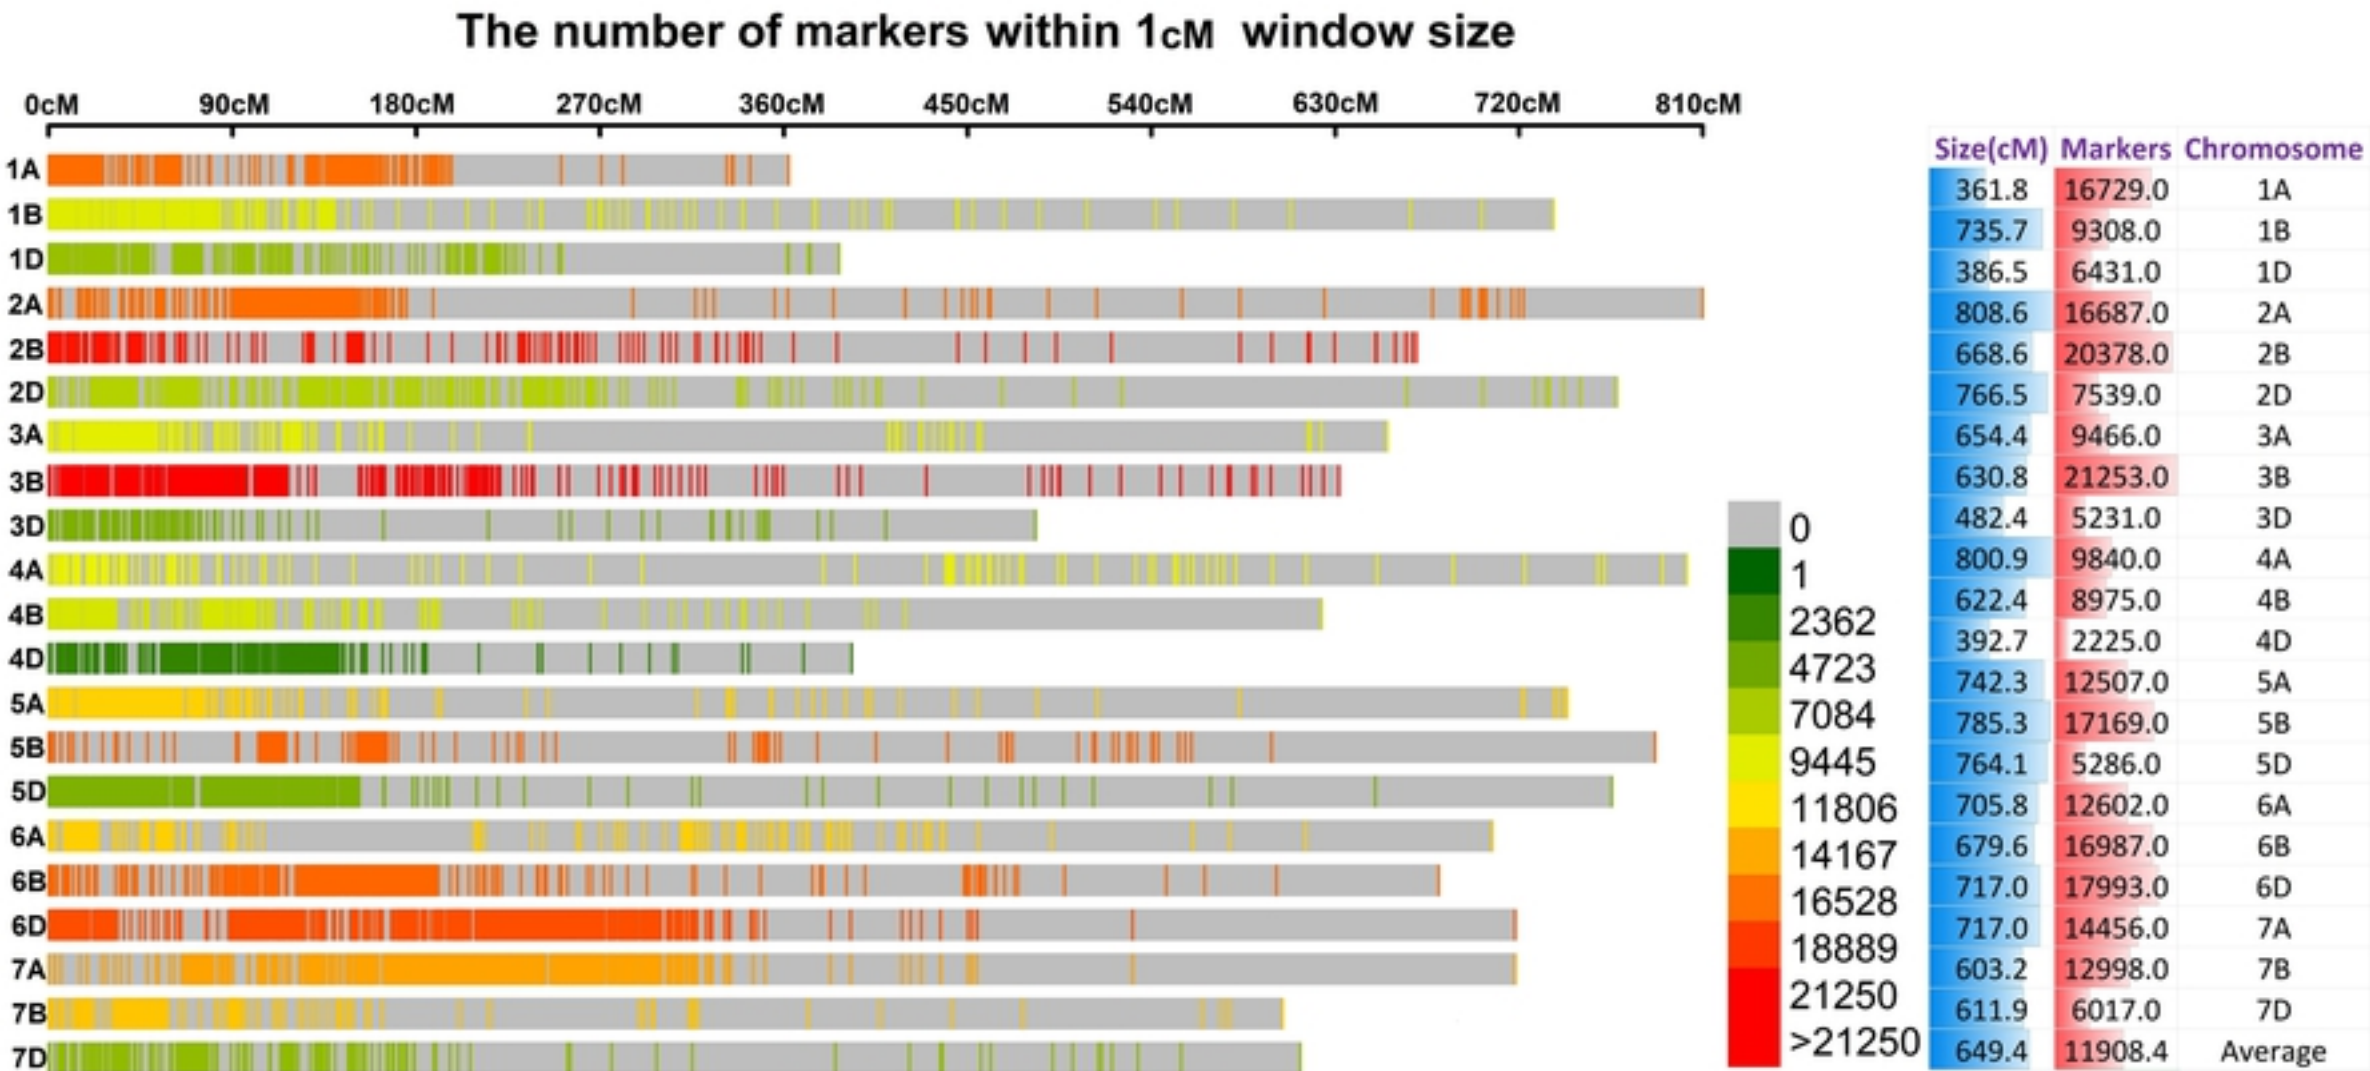

Fig 2. Consensus map, "Wheat\_Reference\_GeneticMap-2021" sho

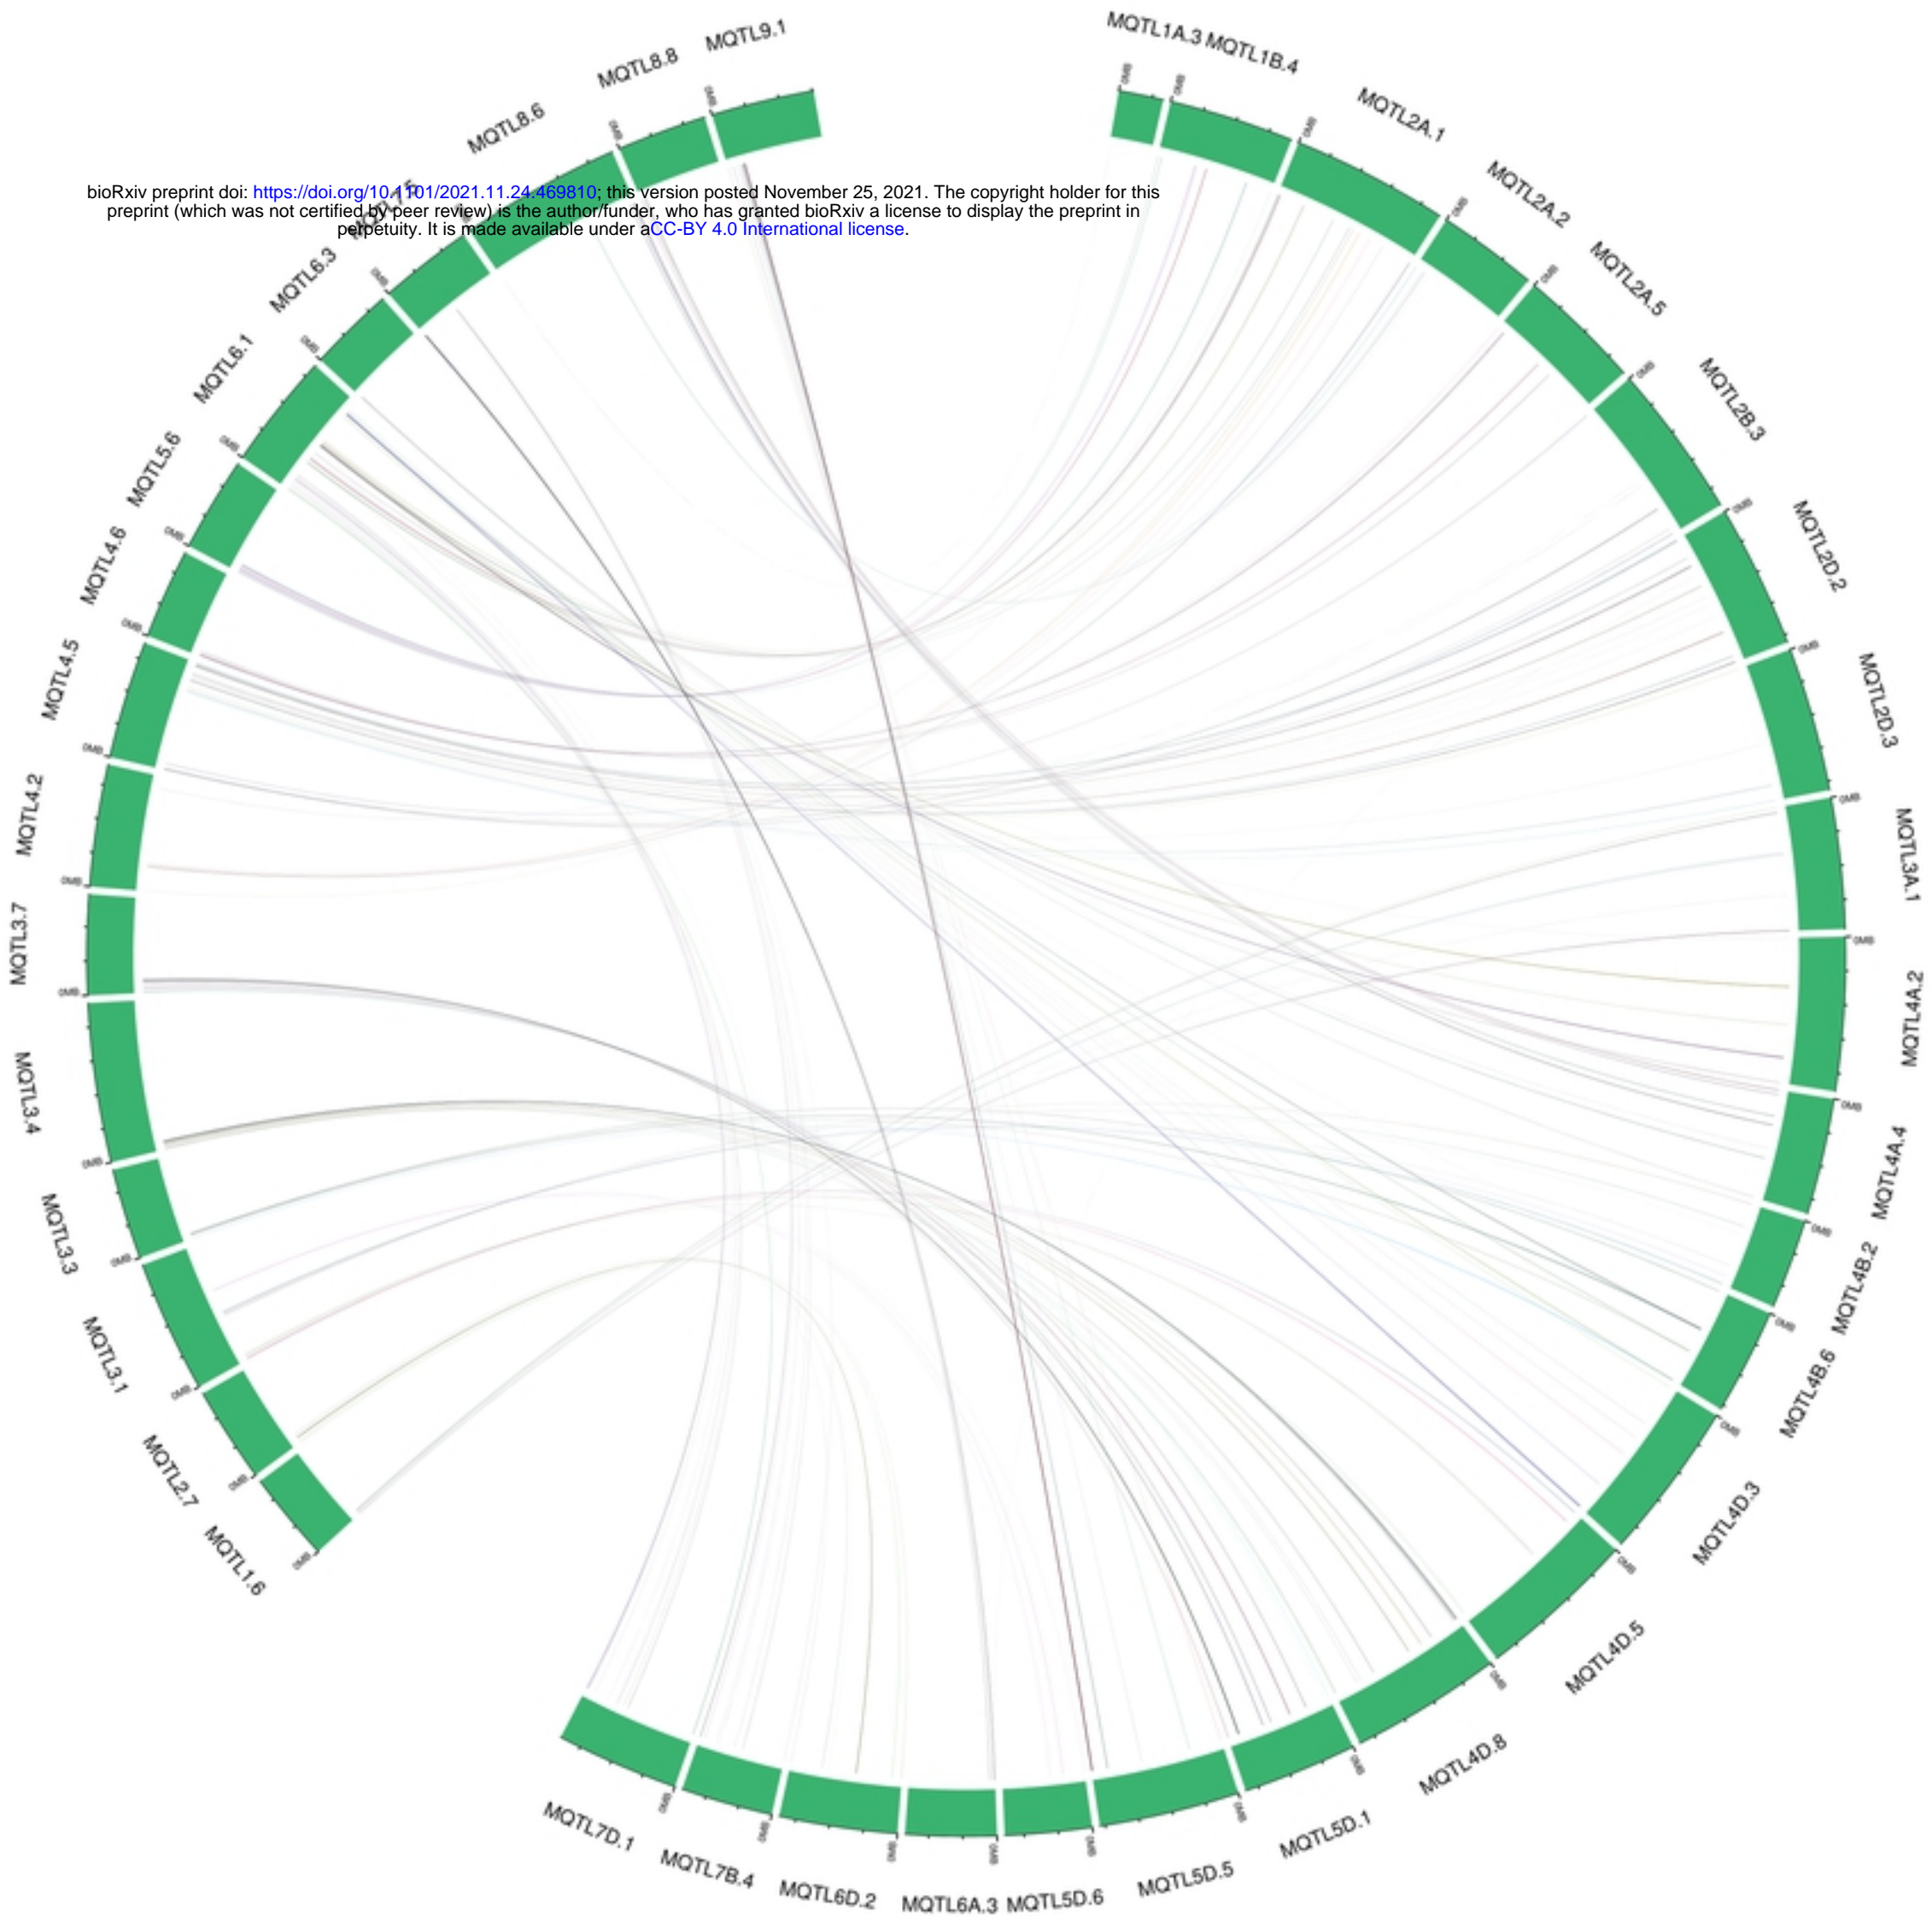

Fig 6. Circular diagram representing the conserved regions between
